# Supplementary material for: Protocol of a randomised clinical trial to integrate mental health services into primary care for postconflict populations in Northern Sri Lanka (COMGAP-S)
Source: PubMed Central journal article supplement — BMJ Open. 2022 Jan 31;12(1):e051441. doi: 10.1136/bmjopen-2021-051441 (PMC8804640; doi:10.1136/bmjopen-2021-051441), 2022-01-31
Supplement: bmjopen-2021-051441.draft_revisions.pdf [file bmjopen-2021-051441.draft_revisions.pdf]

# BMJ Open

BMJ Open is committed to open peer review. As part of this commitment we make the peer review history of every article we publish publicly available.

When an article is published we post the peer reviewers' comments and the authors' responses online. We also post the versions of the paper that were used during peer review. These are the versions that the peer review comments apply to.

The versions of the paper that follow are the versions that were submitted during the peer review process. They are not the versions of record or the final published versions. They should not be cited or distributed as the published version of this manuscript.

BMJ Open is an open access journal and the full, final, typeset and author-corrected version of record of the manuscript is available on our site with no access controls, subscription charges or pay-per-view fees (<http://bmjopen.bmj.com>).

If you have any questions on BMJ Open's open peer review process please email [info.bmjopen@bmj.com](mailto:info.bmjopen@bmj.com)

# BMJ Open

## Protocol of a randomized clinical trial to integrate mental health services into primary care for post-conflict populations in Northern Sri Lanka (COMGAP-S)

|                               |                                                                                                                                                                                                                                                                                                                                                                                                                                                                |
|-------------------------------|----------------------------------------------------------------------------------------------------------------------------------------------------------------------------------------------------------------------------------------------------------------------------------------------------------------------------------------------------------------------------------------------------------------------------------------------------------------|
| Journal:                      | <i>BMJ Open</i>                                                                                                                                                                                                                                                                                                                                                                                                                                                |
| Manuscript ID                 | bmjopen-2021-051441                                                                                                                                                                                                                                                                                                                                                                                                                                            |
| Article Type:                 | Protocol                                                                                                                                                                                                                                                                                                                                                                                                                                                       |
| Date Submitted by the Author: | 18-Mar-2021                                                                                                                                                                                                                                                                                                                                                                                                                                                    |
| Complete List of Authors:     | Doherty, Shannon; Anglia Ruskin University<br>Dass, Giselle; THEME Institute, 50, 13 Old Kesbewa Road, Nugegoda<br>Edward, Anne; THEME Institute, 50, 13 Old Kesbewa Road, Nugegoda<br>Stewart, Robert; King's College London, Institute of Psychiatry<br>Roberts, Bayard; London School of Hygiene and Tropical Medicine,<br>Abas, Melanie; Institute of Psychiatry, King's College London, Section of<br>Epidemiology, Health Services & Population Research |
| Keywords:                     | MENTAL HEALTH, PRIMARY CARE, PSYCHIATRY                                                                                                                                                                                                                                                                                                                                                                                                                        |
|                               |                                                                                                                                                                                                                                                                                                                                                                                                                                                                |

SCHOLARONE™  
Manuscripts

1  
2  
3 **Title:** Protocol of a randomized clinical trial to integrate mental health services into primary care  
4 for post-conflict populations in Northern Sri Lanka (COMGAP-S)  
5  
6  
7  
8  
9  
10

11 **Authors:** Shannon Doherty, PhD, Anglia Ruskin University, Cambridge, United Kingdom;  
12  
13 Giselle Dass, THEME Institute, Colombo, Sri Lanka; Anne Edward, THEME Institute, Colombo,  
14 Sri Lanka; Robert Stewart, MD, King's College London, United Kingdom; Bayard Roberts, PhD,  
15 London School of Hygiene and Tropical Medicine, United Kingdom; Melanie Abas, PhD, King's  
16 College London, United Kingdom  
17  
18  
19  
20  
21  
22  
23  
24  
25

26 **Corresponding Author:** Shannon Doherty, PhD, Anglia Ruskin University, Bishop Hall Lane,  
27 Chelmsford, UK, CM1 1SQ, shannon.doherty@anglia.ac.uk, +44 75 2212 8409  
28  
29  
30  
31  
32  
33  
34  
35  
36  
37  
38  
39  
40  
41  
42  
43  
44  
45  
46  
47  
48  
49  
50  
51  
52  
53  
54  
55  
56  
57  
58  
59  
60

## ABSTRACT

### Introduction

Sri Lanka has a long history of armed conflict and natural disasters increasing risk of mental health disorders in the population. Due to a lack of specialist services, there is a treatment gap between those seeking and those able, to access mental health services. The aim of this research programme is to integrate mental health services into primary care to meet the needs of this post-conflict population.

### Methods and analysis

This is a stepped wedge cluster design randomized clinical trial of the WHO mhGAP primary care mental health training intervention. We will provide a 10-day training to primary care practitioners of 23 randomly selected primary care facilities aimed at increasing their ability to identify, treat, and manage mental health disorders. Public health professionals and community representatives will receive a tailored training intervention to increase mental health awareness. Refresher courses will occur at 3 and 6 months post-training. Supervision and monitoring will occur for one month pre- and post-training. Target sample sizes have been calculated separately for each group of participants and for each outcome.

### Discussion

This clinical trial, which started in February 2018 and is still ongoing, will help build local capacity through a sustainable and culturally appropriate intervention and contribute to reduction of the mental health treatment gap for a population in need.

### Trial Registration

ISRCTN registry ISRCTN62598070, 1 Sept 2017. SLCTR registration number: SLCTR/2018/008, 27 Feb 2018.

## Abbreviations

WHO mhGAP - World Health Organization's mental health Gap Action Programme

LMIC - Low- and middle-income countries

## Keywords

Conflict, clinical trial, health systems, mental health, mhGAP

## Strengths and Limitations

- First study to culturally adapt all mhGAP materials
- Strengthened primary care system and took burden off specialized services
- Showed feasibility of mhGAP training for non-specialists
- Patients were difficult to enroll and retain which makes data limited
- COVID-19 limited ability to deliver later refresher sessions face-to-face

## INTRODUCTION

Mental health disorders often present in primary care settings, especially in low- and middle-income countries (LMIC), where specialized psychiatric services may be lacking. Low- or non-detection, low referral rates for specialist care, and increased costs are all features of mental health disorders in primary care settings in LMIC. Furthermore, lack of adequate training for primary care physicians and lack of involvement of public health personnel can act as barriers to effective treatment and management of mental health disorders in primary care [1, 2]. Barriers can be compounded in post-conflict situations, as existing limited health systems may be severely affected, especially for those internally displaced. There is strong evidence that conflict-driven, internally displaced migrants have increased rates of mental health disorders [1, 3].

1  
2  
3 During 26 years of protracted internal conflict in Sri Lanka, more than 100,000 people of all  
4 ethnicities are estimated to have died, and hundreds of thousands injured [4, 5]. The substantial  
5 internal displacement from conflict was compounded by the 2004 tsunami [6].  
6  
7  
8  
9

10  
11 Although Sri Lanka has a very effective primary care system, the treatment gap for mental  
12 health is extensive, especially for post-conflict populations [1, 7]. While provision of health  
13 services has improved, resources are insufficient to meet population needs, especially those  
14 related to severity of trauma, or to difficulties experienced in displacement or return migration  
15 [8]. Primary care practitioners in the Northern Province region regularly spearhead mental  
16 health care efforts, however, they do so without adequate training. Training primary care  
17 practitioners to deliver mental health care at primary care level is in line with the task-shifting  
18 approach in the global mental health field [2, 9-11]. A pilot feasibility study (COMGAP) to  
19 explore this possibility was conducted in 2013-2014 based on a peer-reviewed protocol and is  
20 reported elsewhere [8].  
21  
22  
23  
24  
25  
26  
27  
28  
29  
30  
31  
32  
33  
34

35 In this context, the aim of COMGAP-S is to use a scaled-up training intervention based on the  
36 World Health Organization Mental Health Gap Action Programme (WHO mhGAP 2.0) to  
37 integrate mental health services into primary care by providing training to primary care  
38 practitioners and public health professionals serving conflict-affected populations in primary care  
39 settings in the Northern Province [12].  
40  
41  
42  
43  
44  
45

46 The first phase of the study was completed in 2015-2016 and facilitated understanding of the  
47 mental disorder burden and treatment gap at primary care level. Results from the cross-  
48 sectional study indicate the most prevalent mental health disorders in primary care settings  
49 were depression (41.1%, 95% CI: 38.7-44.5%), anxiety (46.7%, 95% CI: 41.9-51.5%), post-  
50  
51  
52  
53  
54  
55  
56  
57  
58  
59  
60

1  
2  
3 traumatic stress disorder (13.7%, 95% CI: 10.6-16.8%), and psychosis with hypomania (17.6%,  
4  
5 95 CI: 13.3-21.9) [13].  
6  
7

8 COMGAP-S is the first large-scale trial in the region to use mhGAP to integrate mental health  
9  
10 services into primary care for conflict-affected populations, and is the only trial to include wider  
11  
12 health care staff and community members as part of a long-term strategy to improve mental  
13  
14 health awareness and stigma reduction.  
15  
16  
17  
18  
19  
20  
21  
22

## 23 **METHODS AND ANALYSIS**

### 24 **Aims and objectives**

25  
26  
27 The aim of COMGAP-S is to investigate if implementation of WHO mhGAP training within  
28  
29 primary care settings increases identification and treatment of mental disorders for post-conflict  
30  
31 populations in Northern Province, Sri Lanka.  
32

#### 33 Primary outcomes

- 34  
35  
36 1. 30% increase in patients identified, treated and referred to specialist care for mental disorders  
37  
38 of interest by primary care practitioners. Measured at baseline using the pre/post-monitoring  
39  
40 questionnaires on current practice with mental health patients and compared to post-training  
41  
42 practice.  
43  
44 2. 40% minimum concurrence between diagnoses of patients identified with mental disorders of  
45  
46 interest by trained primary care practitioners and psychiatrists as compared to diagnosis of  
47  
48 patients pre-training (baseline) measured using qualitative interviews.  
49  
50 3. 20% reduction in positive screening for depression and anxiety in patients pre-training and at  
51  
52 3 and 6 months follow-up time points, measured using the Hopkins Symptom-Checklist 25.  
53

#### 54 Secondary outcomes

55  
56  
57  
58  
59  
60

- 1  
2  
3 1. 20% increase between mean pre- and post-training test scores for primary care practitioners  
4 using the WHO mhGAP 2.0 pre/post training test.  
5  
6
- 7 2. At least 50% reduction of mental health stigma measured using AMIQ in primary care  
8 practitioner, public health professional, and community representative participant groups at  
9 training, and 3- and 6-month follow-up.  
10  
11
- 12 3. At least 40% of primary care practitioners and public health professionals in the region will be  
13 delivered training on mhGAP, and at least 2 community representatives from each facility  
14 catchment areas will receive tailored training on mental health awareness and stigma reduction.  
15  
16  
17  
18  
19  
20  
21  
22  
23

## 24 **Study design**

25  
26 This is a randomized clinical trial using a stepped wedge cluster design [14]. This design was  
27 chosen because: 1) in an intervention trying to integrate mental health services into primary  
28 care for post-conflict populations it is unethical to use a parallel design which prevents equal  
29 distribution of knowledge and skills; 2) the stepped wedge cluster design is more logistically  
30 feasible in the post-conflict setting of Northern Sri Lanka [15].  
31  
32  
33  
34  
35  
36  
37  
38

39 Facilities are randomized using standardized randomization techniques to allocate facilities to  
40 the training sequence within the stepped wedge design. Patients and community  
41 representatives were not randomized.  
42  
43  
44  
45  
46

## 47 **Setting**

48  
49 The study setting is 23 government primary care health facilities within the five districts of the  
50 Northern Province: Jaffna, Mannar, Kilinochchi, Vavunia, and Mullaitivu. Full list of participating  
51 sites can be obtained from the Primary Investigator or from the offices of THEME Institute,  
52 Colombo, Sri Lanka.  
53  
54  
55  
56  
57  
58  
59  
60



### **Inclusion criteria**

Facilities are included if they indicate willingness to participate, are located in any of the five districts of Northern Province (Jaffna, Mannar, Kilinochchi, Vavunia, Mullaitivu), provide primary care services, and are either divisional hospitals of type A, B & C or primary medical care units. Facilities should also provide services to conflict-affected, previously displaced populations.

Primary care practitioners are included if they have full registration with the Sri Lankan Medical Council, have at least 6 months or more until their next transfer rotation, or 6 months to retirement. Public health professionals are included if they have at least 6 months left on their transfer rotation, or 6 months to retirement. Community representatives located within the catchment area of each selected facility are included after identification through local registration organisations. Patients are included if they are 18 years or older, attend selected facilities, and belong to internally displaced or conflict-affected populations.

### **Exclusion criteria**

Larger facilities such as district hospitals and teaching hospitals are excluded as they are not part of the primary care system. Private facilities are excluded due to the lack of an official registry.

Primary care practitioners, public health professionals, and community representatives are excluded if they have secondary mental health training. Patients under 18 years and those diagnosed with mental disorders outside of depression and/or anxiety are excluded.

### **Recruitment and enrolment**

1  
2  
3 Support letters from Provincial Department of Health Service, and Regional Divisional Health  
4 Secretariats in each district of Northern Province are used to approach primary care  
5 practitioners and public health professionals. Community representatives are recruited through  
6 local registration organizations. Patients are recruited by primary care practitioners. Trained  
7 research team members perform screening and enrolment procedures and gain informed  
8 consent for each participant group following established study protocols.  
9  
10  
11  
12  
13  
14  
15  
16  
17

### 18 **Ethics approvals**

19  
20 Ethical approval has been received from the Faculty of Health, Education, Medicine and Social  
21 Care, Anglia Ruskin University, UK (SC/jc/FMFREP/16/17 076), from the Faculty of Medicine,  
22 University of Jaffna, Sri Lanka (J/ERC/17/81/NDR/0170) and non-engagement approval from  
23 the funding body, the Centers for Disease Control and Prevention (2018-015).  
24  
25  
26  
27  
28  
29

### 30 **Structure and delivery of the intervention**

31  
32 Training material was adapted for local use and included translation and cultural adaption of  
33 relevant modules of the WHO mhGAP 2.0 IG, and production of locally adapted and developed  
34 mhGAP video material for the Tamil context [16]. This was completed in collaboration with local  
35 academics, psychiatrists, primary care practitioners, Northern Province Ministry of Health, and  
36 the University of Jaffna.  
37  
38  
39  
40  
41  
42  
43  
44

#### 45 **Primary care practitioners and patients**

46  
47 Primary care practitioners in each selected facility undergo one month of monitoring prior to  
48 training to establish a baseline. They receive a paper booklet to record information on patients  
49 identified, treated, managed, and/or referred for mental health disorders. Further, before  
50 training, primary care practitioners recruit up to eight patients using provided inclusion and  
51 exclusion criteria to have their diagnosis verified by a psychiatrist. Members of the research  
52  
53  
54  
55  
56  
57  
58  
59  
60

1  
2  
3 team provide patients with information sheets and obtain informed consent. Patients complete a  
4 brief socio-demographic questionnaire at point of recruitment and the Hopkins Symptom  
5 Checklist-25 screening questionnaire for depression and anxiety at point of recruitment, and at 3  
6 and 6 months follow-up to establish a baseline, and determine if patient outcomes change after  
7 training of primary care practitioners. Primary care practitioners are asked detailed questions  
8 about their management and treatment of recruited patients, and patients are asked about any  
9 treatments undertaken or medications prescribed to understand any intervening factors between  
10 baseline, and 3 and 6 months follow-up.  
11  
12  
13  
14  
15  
16  
17  
18  
19  
20  
21

22 After the one-month monitoring period, primary care practitioners undergo a 3-day training  
23 intervention delivered in their primary care facility. Trained members of the research team  
24 deliver training at each selected facility to minimize disruption of work at facilities.  
25  
26  
27  
28  
29

30 After completion of training, monitoring of primary care practitioners continues for one month,  
31 where they continue to use the paper booklet to record information on patients they identify,  
32 treat, manage, and/or refer for common mental health disorders. Research team members visit  
33 or telephone the primary care practitioners once a week at their facility to monitor  
34 implementation of the training intervention.  
35  
36  
37  
38  
39  
40  
41  
42

43 After the one-month monitoring period primary care practitioners continue to use paper booklets  
44 to record their experience of the training implementation for six weeks. At this point (three  
45 months post-training) primary care practitioners participate in a 1-day refresher course and  
46 continue to use the experience of training implementation application for a further three months.  
47 At six months post-training, primary care practitioners take a second 1-day refresher course  
48 (Figure 1).  
49  
50  
51  
52  
53  
54  
55  
56  
57  
58  
59  
60

### Public health professionals

Public health professionals in each selected facility undergo one month of monitoring prior to training to establish a baseline. Each enrolled public health professional records information in a paper booklet on facilitation of referral and follow-up practices for mental health patients, and supporting primary care practitioners with patient management activities. After the one-month monitoring period, public health professionals are provided with a tailored 3-day training programme on mental health awareness, management, referral, and stigma reduction. After training, public health professionals undergo one month of monitoring and record the same information as in the pre-monitoring period to see how/if practice has changed. Research team members visit or telephone their facility once a week to monitor implementation of the training intervention.

After the one-month, monitoring period public health professionals record information on their experience of the training intervention for six weeks. At this point (three months post-training), public health professionals participate in a 1-day refresher course and continue to use the paper booklets to record their experience of training implementation for a further three months. At six months post-training, public health professionals take a second 1-day refresher course (Figure 2).

### Community representatives

Community representatives undergo one month of monitoring prior to training to establish a baseline. Each enrolled community representative records information in a paper booklet on mental health awareness raising activities undertaken, and any referrals of people they encounter with mental health issues. After the one-month monitoring period, community representatives participate in a tailored 1-day training programme on mental health awareness, stigma reduction, and finding local resources. After training, community representatives undergo

1  
2  
3 one month of monitoring and record the same information as in the pre-monitoring period to see  
4 how/if practice has changed. Research team members visit or telephone once a week to  
5 monitor implementation of the training intervention.  
6  
7  
8  
9

10  
11 After the one-month, monitoring period community representatives' record information on their  
12 experience of the training intervention in paper booklets for six weeks. At this point (three  
13 months post-training), community representatives participate in a half-day refresher course and  
14 continue to use provided booklets to record their experience of training implementation for a  
15 further three months. At six months post-training, community representatives participate in a  
16 second half-day refresher course (Figure 3).  
17  
18  
19  
20  
21  
22  
23  
24  
25

### 26 **Timing of intervention delivery and follow-up**

27  
28 COMGAP-S runs for 7 months in each facility and catchment area. Every 2 weeks a facility is  
29 enrolled in the study until all 23 have completed the study timeline. Participants discontinuing  
30 engagement are not subject to follow-up. Measures are collected at six time points:  
31  
32  
33

- 34 1. Pre-training monitoring period: questionnaire to establish a baseline on current practice.  
35 Primary care practitioners only: recruitment of patients for diagnosis verification.  
36 Patients administered Hopkins Symptom Checklist 25 for anxiety and/or depression (baseline),  
37 and at 3 and 6 months follow-up to assess change in clinical symptoms.  
38
- 39 2. Pre-training intervention: WHO mhGAP knowledge pre-test and AMIQ stigma questionnaire.  
40
- 41 3. Post-training intervention: second administration of WHO mhGAP knowledge test.  
42
- 43 4. Post-training monitoring period: questionnaire to establish if/how practice has changed, and  
44 qualitative interviews to reflect on initial diagnosis practice.  
45
- 46 5. 3 months follow-up training: WHO mhGAP pre- and post- knowledge test and AMIQ stigma  
47 questionnaire.  
48  
49  
50  
51  
52  
53  
54  
55  
56  
57  
58  
59  
60

1  
2  
3 6. 6 months follow-up training: WHO mhGAP pre- and post- knowledge test and AMIQ stigma  
4 questionnaire.  
5  
6  
7

### 8 9 **Patient and Public Involvement**

10 Research materials and project aims were developed in collaboration with academic and  
11 service provider stakeholders to ensure priorities were addressed. Participants were consulted  
12 during the pilot stage to ensure research questions and materials were appropriate and  
13 relevant. Once the trial has been published, participants and the public will be informed of the  
14 results through a dedicated website (<http://globalhme.org>) as well as through paper leaflets,  
15 townhall discussions and social media to ensure both specialist and non-specialist audience can  
16 access study findings.  
17  
18  
19  
20  
21  
22  
23  
24  
25  
26  
27

### 28 **Data management**

29 Data is collected on tablets and uploaded to a secure server. Data is cleaned and checked  
30 throughout the trial. Paper records are scanned in by local research team members and held on  
31 secure desktop computers and a password-protected hard drive. Team members and selected  
32 staff from the funding body will have access to the full dataset.  
33  
34  
35  
36  
37  
38  
39  
40

### 41 **Statistical methods**

42 An intention-to-treat analysis will be used. Analysis will include generalized linear regression  
43 modules to adjust for repeated measures and descriptive analytics.  
44  
45  
46  
47  
48

### 49 **Sample size calculation**

50 A total of 23 primary care practitioners, 75 public health professionals, 50 community  
51 representatives, and 200 patients will be recruited. Target sample sizes were calculated  
52 separately for each participant group and for each outcome. Sample sizes for the first and  
53  
54  
55  
56  
57

1  
2  
3 second outcomes were calculated following methods described by Hemming and Taljaard,  
4 where each outcome is considered an individually randomized trial and then multiplied by a  
5 design effect to account for the stepped wedge design [17]. Sample sizes for the third and fourth  
6 outcomes were calculated using formulae from the 1994 textbook “Analysis of Longitudinal  
7 Data” by Diggle, Liang and Zeger [18].  
8  
9  
10  
11  
12

### 13 14 15 **Dissemination and access**

16  
17  
18 Trial results and analyses will be purposefully communicated to the Provincial Department of  
19 Health Service, Regional Divisional Health Secretariats in the five districts, participating  
20 healthcare professionals and community representatives. Dissemination events will be held with  
21 the University of Jaffna. Activities will include publications and presentations to general and  
22 specialized audience by team members. The research dataset and statistical analyses will be  
23 available by request from the primary investigator.  
24  
25  
26  
27  
28  
29  
30  
31

### 32 33 **Trial Status**

34  
35 A planned pilot was completed between 24<sup>th</sup> January and 11<sup>th</sup> February 2018 in the Mullaitivu  
36 district in Northern Sri Lanka. Recruitment and enrolment for the full clinical trial period  
37 commenced in March 2018. Due to the COVID-19 pandemic the project has been granted a no-  
38 cost extension and data collection will be completed under local health regulations. At present,  
39 21 of 23 facilities have been successfully recruited.  
40  
41  
42  
43  
44  
45  
46  
47

### 48 49 **Data Monitoring**

50  
51 The funder Centers for Disease Control and Prevention acted as a *de facto* data monitoring  
52 committee as they reviewed clinical trial progress quarterly and audited progress yearly. Only  
53 the Principal Investigator and select research team members will have access to interim data for  
54 quality checks and data cleaning. In the unlikely event that a participant reported an adverse  
55  
56  
57  
58  
59  
60

1  
2  
3 event, standard operating procedures as per the COMGAP-S training manual would be  
4 followed.  
5  
6  
7

## 8 9 **Evaluation**

### 10 **Cost Ratio Economic Evaluation**

11  
12 This component will involve two evaluations. The first will evaluate the ratio between costs  
13 associated of training primary care practitioners to identify, treat and refer mental health care  
14 patients compared to costs of referral to, and treatment from, psychiatrists. Costs will be linked  
15 to the primary outcome measure to determine the extra cost of training incurred to detect one  
16 extra patient and understand economic implications of service provision to conflict-affected  
17 populations [19]. The second will evaluate the ratio between costs associated with patients  
18 receiving care from trained primary care practitioners at primary care facilities compared to  
19 costs of seeking care from specialist psychiatrists.  
20  
21  
22  
23  
24  
25  
26  
27  
28  
29  
30

### 31 **Process Evaluation**

32  
33 After initial training, 3 and 6 month refresher courses, quantitative and qualitative feedback will  
34 be collected from participants to explore how training was received. Qualitative case studies  
35 with primary health care staff, trainers, supervisors, patients will take place during post-training  
36 monitoring and evaluation periods to understand how the programme was received and  
37 implemented. Descriptive analysis will be used for quantitative data, while thematic analysis will  
38 be used for qualitative data.  
39  
40  
41  
42  
43  
44  
45  
46  
47  
48

## 49 **Protocol amendments**

50  
51 Changes to the protocol will be reported by official letter to the sponsor institution, the sponsor  
52 ethics panel, the in-country ethics board, and the funder.  
53  
54  
55  
56  
57  
58  
59  
60



## DISCUSSION

Due to the history of conflict and displacement in Sri Lanka, it is vital to address unmet mental health needs of the population. The completed cross-sectional survey at primary care level supports this and demonstrates prevalence and predictors of mental health disorders in the region. The WHO mhGAP IG 2.0 training programme provides a strategy to address this gap between those seeking, and those able, to access mental health services in the region. COMGAP-S will not only demonstrate the feasibility of implementing the mhGAP training programme, but ongoing monitoring activities will contribute to evaluation of both training and implementation.

Using the mhGAP guide to train on mental health services could empower primary care practitioners to effectively address mental health needs of the population in this post-conflict setting. Additionally, training public health professionals and community representatives can positively increase mental health awareness and decrease stigma in the local community. Training materials have undergone cultural adaptation to ensure training is relevant and acceptable to all participants and stakeholders. Use of a locally adapted mhGAP guide will increase acceptability and sustainability of the implementation of the clinical trial. This project includes key stakeholders from Northern Ministry of Health, University of Jaffna, Sri Lankan psychiatrists, and Sri Lankan researchers. Thus, COMGAP-S will not only contribute to the evidence base on integrating mental health services in primary care in low resource settings, it will also build local capacity, be culturally relevant, and sustainable.

COMGAP-S will be the first large-scale implementation of WHO mhGAP IG 2.0 training to improve mental health service delivery in primary care in Northern Province, Sri Lanka.

Implementation of COMGAP-S aims to build capacity within the primary care system in the

1  
2  
3 region, but also improve mental health service delivery addressing the unmet needs of a  
4  
5 vulnerable population.  
6  
7  
8  
9  
10  
11  
12  
13  
14  
15  
16  
17  
18  
19  
20  
21  
22  
23  
24  
25  
26  
27  
28  
29  
30  
31  
32  
33  
34  
35  
36  
37  
38  
39  
40

41 **Authors' contributions:** CS and SD developed the concept and design of this study with  
42 contributions from GD, AE, BR, RS and MA. CS and SD wrote the manuscript with contributions  
43 from GD, AE, BR, RS and MA. All authors commented on and approved the final version of this  
44 manuscript.  
45  
46  
47  
48

49 **Funding statement:** This journal article was supported by the Centers for Disease Control and  
50 Prevention, Cooperative Agreement Number, 1U01GH001654-01. Its contents are solely the  
51 responsibility of the authors and do not necessarily represent the official views of the Centers for  
52 Disease Control and Prevention or the Department of Health and Human Services. The Funding  
53 organization was involved in consultations regarding the scientific validity of the design, analysis  
54  
55  
56  
57  
58  
59  
60

1  
2  
3 of the data, preparation and review of the manuscript for publication. The Northern Ministry of  
4 Health, Sri Lanka was involved in management of the data collection. The University of Jaffna,  
5 Sri Lanka was involved in consultations on the design of the study, collection and interpretation  
6 of data, preparation and review of the manuscript for publication. RS is part-funded by: i) the  
7 National Institute for Health Research (NIHR) Biomedical Research Centre at the South London  
8 and Maudsley NHS Foundation Trust and King's College London; ii) a Medical Research  
9 Council (MRC) Mental Health Data Pathfinder Award to King's College London; iii) an NIHR  
10 Senior Investigator Award.  
11  
12  
13  
14  
15

16  
17 **Competing interests statement:** RS declares research support received in the last 5 years  
18 from Roche, Janssen, GSK and Takeda.  
19  
20  
21  
22

23  
24 **Ethics approvals:** This trial has received ethical approval from the Faculty of Medical Science,  
25 Anglia Ruskin University, UK (SC/jc/FMFREP/16/17 076), from the Faculty of Medicine,  
26 University of Jaffna, Sri Lanka (J/ERC/17/81/NDR/0170) and non-engagement approval from  
27 the funding body, the Centers for Disease Control and Prevention (2018-015). All participants  
28 gave written consent.  
29  
30  
31  
32

33  
34 **Availability of data and materials:** Data presented in this paper are available from the  
35 corresponding author on request.  
36  
37

38  
39 **Acknowledgements:** The authors would like to sincerely thank Dr Chesmal Siriwardhana who  
40 unexpectedly passed away in 2016. Dr Siriwardhana was the original Principal Investigator and  
41 was responsible for the initial conception of this study. This publication was supported by the  
42 Cooperative Agreement Number GH001654, funded by the Centers for Disease Control and  
43 Prevention. Its contents are solely the responsibility of the authors and do not necessarily  
44 represent the official views of the Centers for Disease Control and Prevention or the Department  
45 of Health and Human Services. This project was also supported by the Northern Ministry of  
46 Health, Sri Lanka, and the University of Jaffna, Sri Lanka.  
47  
48  
49  
50  
51

52 **Protocol version:** 11 November 2017, version 2  
53  
54  
55  
56  
57  
58  
59  
60

1  
2  
3 **Name and contact of trial sponsor:** Anglia Ruskin University, Faculty of Health, Education,  
4 Medicine, and Social Care, 4<sup>th</sup> Floor William Harvey Building, Bishop Hall Lane, Chelmsford,  
5 UK, CM11SQ  
6  
7

8  
9 **Dissemination policy:** Publications, updates on social media, stakeholder meetings  
10  
11  
12  
13  
14  
15  
16  
17  
18  
19  
20  
21  
22  
23  
24  
25  
26  
27  
28  
29  
30  
31  
32  
33  
34  
35  
36  
37  
38  
39  
40  
41  
42  
43  
44

## References

1. Siriwardhana C, Adikari A, Pannala G, et al. Prolonged Internal Displacement and Common Mental Disorders in Sri Lanka: The COMRAID Study. PLOS ONE 8(5): e64742. <https://doi.org/10.1371/journal.pone.0064742> [published Online First: 22 May 2013].
2. Patel V, Belkin GS, Chockalingam A, Cooper J, et al. Grand Challenges: Integrating Mental Health Services into Priority Health Care Platforms. PLOS Medicine 10(5): e1001448. <https://doi.org/10.1371/journal.pmed.1001448> [published Online First: 28 May 2013].
3. Makhshvili N, Chikovani I, McKee M, et al. Mental Disorders and Their Association With Disability Among Internally Displaced Persons and Returnees in Georgia. Journal of Traumatic

1  
2  
3 Stress. 2014;27(5):509-518. <https://doi.org/10.1002/jts.21949> [published Online First: 16  
4 October 2014].  
5

6  
7 4. Somasundaram D. Recent disasters in Sri Lanka: lessons learned. *Psychiatric Clinics*  
8 2013;36(3), 321-338. [published Online First: 1 September 2013].  
9

10 5. Husain F, Anderson M, Cardozo BL, et al. Prevalence of war-related mental health conditions  
11 and association with displacement status in postwar Jaffna District, Sri Lanka. *JAMA*,  
12 2011;306(5), 522-531. <https://doi.org/10.1001/jama.2011.1052> [published Online First: 3 August  
13 2011].  
14

15 6. Siriwardhana, C. Windows of opportunity after a disaster: the case of Sri Lanka. *Asian*  
16 *Bioethics Review*, 2010;2(2).  
17

18 7. Jenkins R, Baingana F, Ahmad R, McDaid D, Atun R. Social, economic, human rights and  
19 political challenges to global mental health. *Ment Health Fam Med*. 2011 Jun;8(2):87-96.  
20

21 8. Siriwardhana C, Adikari A, Pannala G, et al. Changes in mental health prevalence among  
22 long-term displaced and returnee forced migrants in Sri Lanka (COMRAID-R). *BMC Psych*,  
23 2015;15, 41.  
24

25 9. Patel V, Chowdhary N, Rahman A, Verdelli H. Improving access to psychological treatments:  
26 Lessons from developing countries. *Behaviour Research and Therapy*. 2011;49(9):523-8.  
27 <https://doi.org/10.1016/j.brat.2011.06.012>  
28  
29

30 10. Chibanda D, Mesu P, Kajawu L, Cowan F, Araya R, Abas MA. Problem-solving therapy for  
31 depression and common mental disorders in Zimbabwe: piloting a task-shifting primary mental  
32 health care intervention in a population with a high prevalence of people living with HIV. *BMC*  
33 *Pub Health*. 2011;11(1). <https://doi.org/10.1186/1471-2458-11-828> [published Online First: 26  
34 October 2011]  
35

36 11. Lund C, Tomlinson M, De Silva M, Fekadu A, Shidhaye R, et al. PRIME: A Programme to  
37 Reduce the Treatment Gap for Mental Disorders in Five Low- and Middle-Income Countries.  
38 *PLOS Medicine* 2012;9(12): e1001359. <https://doi.org/10.1371/journal.pmed.1001359>  
39 [published Online First: 27 December 2012]  
40  
41

42 12. World Health Organization. mhGAP training manuals for the mhGAP intervention guide for  
43 mental, neurological and substance use disorders in non-specialized health settings. World  
44 Health Organization, 2017. [https://www.who.int/publications-detail/mhgap-intervention-guide---  
45 version-2.0](https://www.who.int/publications-detail/mhgap-intervention-guide---version-2.0).  
46

47 13. Doherty S, Hulland E, Lopes-Cardozo B, Kirupakaran S, Surenthirakumaran R, Cookson S,  
48 et al. Prevalence of mental disorders and epidemiological associations in post-conflict primary  
49 care attendees: a cross-sectional study in the Northern Province of Sri Lanka. *BMC Psychiatry*.  
50 2019;19(1). <https://doi.org/10.1186/s12888-019-2064-0> [published Online First 4 March 2019].  
51  
52

53 14. Brown CA, Lilford RJ. The stepped wedge trial design: a systematic review. *BMC Med Res*  
54 *Method*. 2006;6(1). <https://doi.org/10.1186/1471-2288-6-54> [published Online First 8 November  
55 2006].  
56  
57

- 1  
2  
3  
4 15. Siriwardhana C, Adikari A, Jayaweera K, Abeyrathna B, Sumathipala A. Integrating mental  
5 health into primary care for post-conflict populations: a pilot study. *Intl Jour Ment Health Sys*  
6 2016;10(1). <https://doi.org/10.1186/s13033-016-0046-x> [published Online First 27 February  
7 2016].  
8
- 9 16. Doherty S, Dass G, Edward A, Manolova G, Solomon M. Challenges and lessons learned in  
10 re-filming the WHO mhGAP training videos for Sri Lankan context - a qualitative study. *Conflict*  
11 *and Health*. 2020;14(1) <https://doi.org/10.1186/s13031-020-00259-z> [published Online First 13  
12 February 2020].  
13
- 14 17. Hemming K, Taljaard M. Sample size calculations for stepped wedge and cluster  
15 randomised trials: a unified approach. *J Clin Epi* 2016;69:137–46.  
16 <https://doi.org/10.1016/j.jclinepi.2015.08.015> [published Online First 5 September 2015].  
17  
18
- 19 18. Diggle P, Diggle PJ, Heagerty P, Liang KY, Heagerty PJ, & Zeger S. Analysis of  
20 Longitudinal Data. Oxford University Press 2002.  
21
- 22 19. Chisholm D, James S, Sekar K, Kumar KK, Murthy RS, Saeed K, et al. Integration of mental  
23 health care into primary care. *Brit J Psych* 2000;176(6):581–8.  
24 <https://doi.org/10.1192/bjp.176.6.581> [published Online First 2 January 2018].  
25  
26  
27  
28  
29  
30  
31  
32  
33  
34  
35  
36  
37  
38  
39  
40  
41  
42  
43  
44  
45  
46  
47  
48  
49  
50  
51  
52  
53  
54  
55  
56  
57  
58  
59  
60

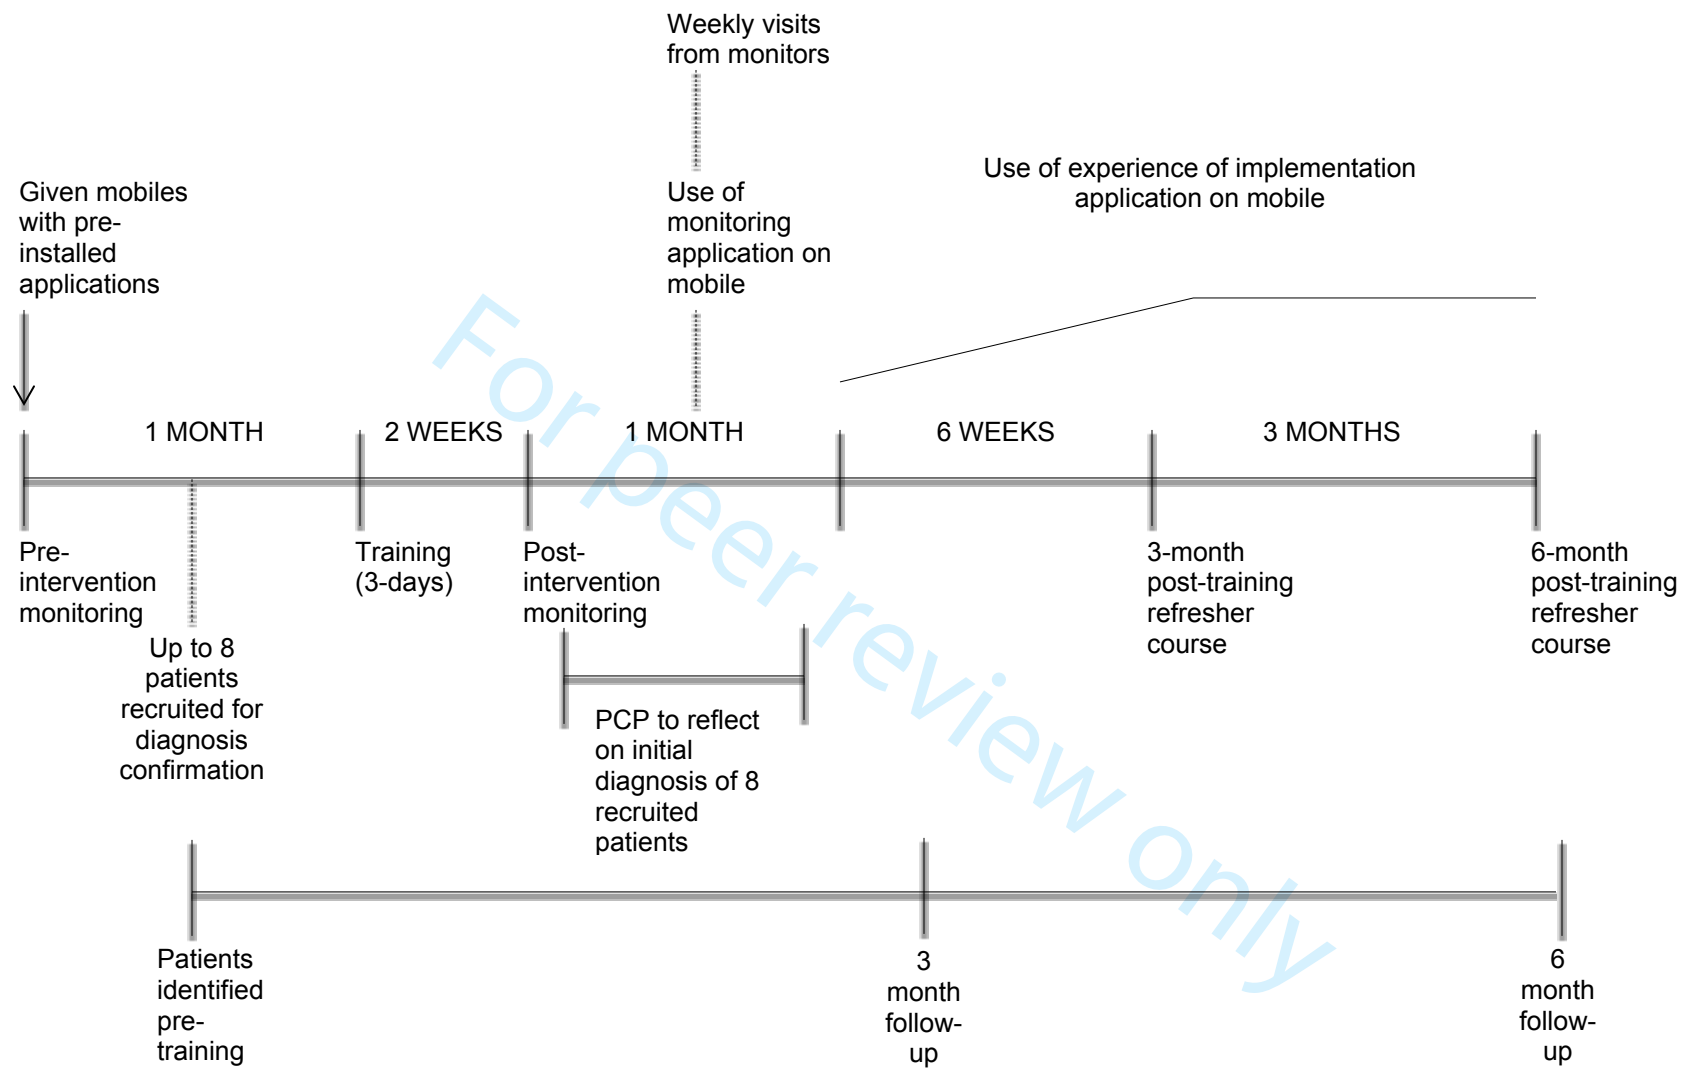

Figure 1. Primary Care Practitioner study timeline

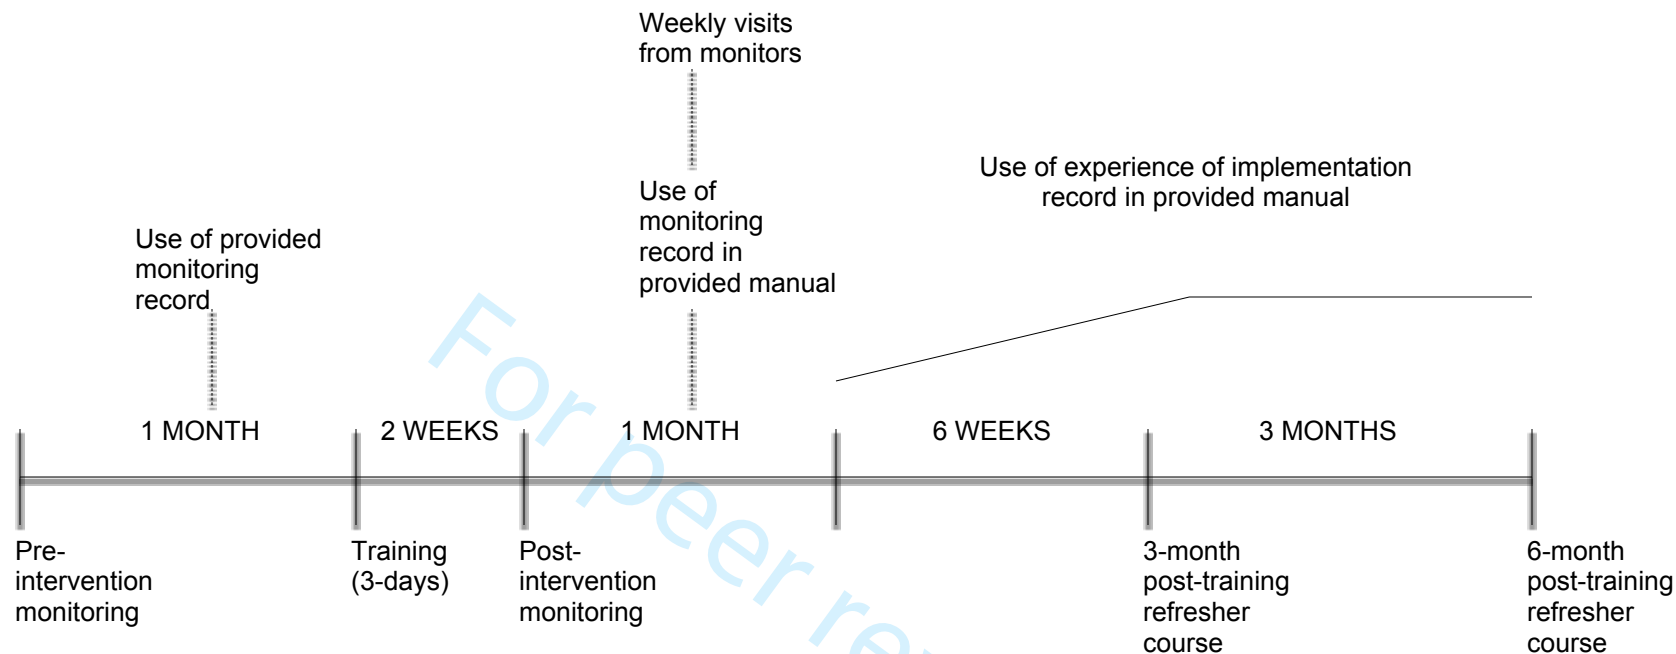

**Figure 2.** Public Health Professional study timeline



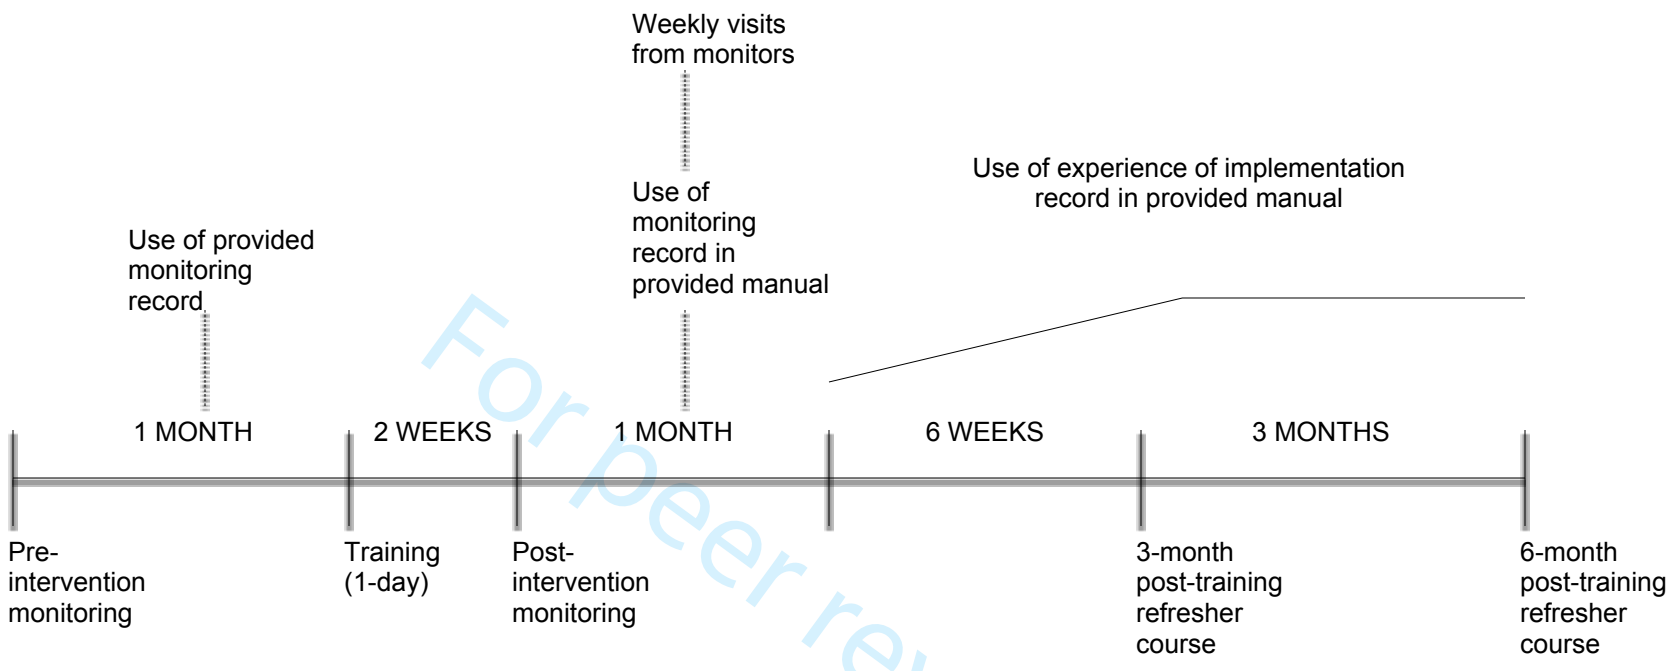

Figure 3. Community representative study timeline

## Annex 1: Detailed Sample Size Procedure

### Outcome 1: Patient outcomes – change in mental health symptoms

For the outcome of assessing change patient's responses to the HSCL questionnaire to assess depression and anxiety we considered this a stepped wedge design as patients will be recruited within facilities, which will be randomized into the study in a stepped-wedge manner. Using the formula for individual randomized trials with a stepped wedge design effect, we assumed an alpha of 0.5, an ICC of 0.5, 4 patients per facility and a calculated stepped-wedge design effect of 1.5. Using data from a previous study of HSCL outcomes in Sri Lanka, we assumed a mean baseline score of 22 (SD: 7.5) for depression and mean baseline score of 16 (SD: 6.5) for anxiety [Hollifield et al., 2008]. In order to detect a 25% decrease from baseline to endline, a calculated 87 patients for depression and 86 patients for anxiety would be required, resulting in 22 facilities needed per outcome. As we specify a necessary 25 facilities in the following three outcomes, we plan to include all 25 facilities in this portion as well. To account for an anticipated loss to follow up as large as 50%, the number of patients needed per facility was adjusted to 8, yielding a final total sample size of 200 patients.

| HSC L outcome | Baseline Mean Score | Endline Mean Score | SD  | Change | Alpha | Power | n per cluster | n per cluster with 50% LTFU* | Number of steps | ICC  | Individual Randomized Sample Size Needed | DEFF <sub>s</sub> | SW Sample Size needed | # clusters needed | Total patient sample size (accounting for 50% LTFU and 25 clusters) |
|---------------|---------------------|--------------------|-----|--------|-------|-------|---------------|------------------------------|-----------------|------|------------------------------------------|-------------------|-----------------------|-------------------|---------------------------------------------------------------------|
| Depression    | 22                  | 16.5               | 7.5 | 25%    | 0.05  | 0.80  | 4             | 8                            | 25              | 0.50 | 59                                       | 1.5               | 87                    | 22                | 200                                                                 |
| Anxiety       | 16                  | 11.2               | 6.5 | 25%    | 0.05  | 0.80  | 4             | 8                            | 25              | 0.50 | 58                                       | 1.5               | 86                    | 22                | 200                                                                 |

\*Loss to follow up

### Outcome 2: Change in knowledge scores of primary care practitioners, public health professionals, community representatives

The goal of the second outcome is to assess the change in provider knowledge score from baseline to endline, considering three different groups of providers: primary care providers, public health professionals, and community representatives. Sample size was calculated for each group separately, with the assumption that each facility will have 1 primary care practitioner and 3 public health professionals, and that the catchment area will have at least 2 community representatives. The sample sizes for community representatives and public health professionals were calculated using a stepped-wedge cluster design as more than one individual per facility is being selected; however, since there is only 1 primary care practitioners per facility, this was considered a simple random sample with 26 repeated measures (25 time points plus a baseline measurement). Assuming a baseline mean score of 65 and a pooled standard deviation of 12 across all three groups [Siriwardhana et al., 2016], an ICC of 0.5, and an alpha of 0.05, using the 25 facilities needed for the first outcome will provide adequate power

| Provider type | Baseline mean score | Endline mean score | Pooled SD | Difference % | Alpha | Power | Number of steps | ICC  | Individual Randomized Sample Size Needed | DEF $F_{SW}$ | SW Sample Size needed | # clusters needed |
|---------------|---------------------|--------------------|-----------|--------------|-------|-------|-----------------|------|------------------------------------------|--------------|-----------------------|-------------------|
| PCP           | 65                  | 78                 | 12        | 20%          | 0.05  | 0.80  | 25              | 0.50 | 27                                       | 1*           | 14                    | 14                |
| CR            | 65                  | 78                 | 12        | 20%          | 0.05  | 0.80  | 25              | 0.50 | 27                                       | 1.5          | 40                    | 20                |
| PHP           | 65                  | 78                 | 12        | 20%          | 0.05  | 0.80  | 25              | 0.50 | 27                                       | 1.5          | 40                    | 14                |

to detect a change in score of 20% from baseline to endline in each of the three groups.

\*As we only have one primary care practitioner per facility, this is regarded as a simple random sample

### Outcome 3: Concurrence of diagnosis by primary care practitioners in facilities with those of specialists

For the outcome of assessing change in concurrence by primary care practitioners in facilities with those of specialist psychiatrists, sample size was calculated considering a simple random sample using the formula for binary responses proposed by Diggle et al. [1994] for repeated measures. Assuming a baseline concurrence of 0.3, an endline concurrence of 0.70, an alpha of 0.05, and 80% power, 26 repeated measures (25 steps plus a baseline measurement), an ICC of 0.5, a sample size of 25 PCPs is needed to detect a difference of 0.4 (40%) from baseline to endline.

| Baseline proportion | Endline proportion | Difference | Alpha | Power | Number of repeated measures | ICC | Sample Size Needed |
|---------------------|--------------------|------------|-------|-------|-----------------------------|-----|--------------------|
| 0.3                 | 0.70               | 0.4        | 0.05  | 0.80  | 26                          | 0.5 | 25                 |

#### Outcome 4: Changes in the numbers of correct identification, treatment and referral of patients by primary care practitioners

For the outcome of assessing change in correct identification, treatment and referral of patients at the facility level, using the formula for binary responses proposed by Diggle et al. [1994] for repeated measures, 25 facilities will yield sufficient power (0.8) to detect a minimum detectable difference of 0.3 (30%) from baseline to endline assuming an alpha of 0.05, a baseline referral accuracy of 0.20, 26 repeated measures (25 steps plus a baseline measurement), and an ICC of 0.3.

| Baseline proportion | Endline proportion | Difference | Alpha | Power | Number of repeated measures | ICC | Sample Size Needed |
|---------------------|--------------------|------------|-------|-------|-----------------------------|-----|--------------------|
| 0.2                 | 0.60               | 0.3        | 0.05  | 0.80  | 26                          | 0.3 | 25                 |

Formulae used in calculations:

#### 1. Hemming and Taljaard [2016]

$$DEFF_{SW} = (k + 1) \frac{1 + \rho(km + m - 1)}{1 + \rho(\frac{1}{2}km + m - 1)} * \frac{3(1 - \rho)}{2(k - \frac{1}{k})}$$

where  $k$  = the number of steps

$\rho$  = Intracluster Correlation Coefficient (ICC)

$m$  = number of individuals per cluster per step

#### 2. Diggle's formula for binary response

$$n = \frac{z_{\alpha}\{2\bar{p}\bar{q}(1 + (r - 1)\rho)\}^{1/2} * z_{\beta}\{(1 + (r - 1)\rho)(p_Aq_A + p_Bq_B)\}^{1/2} * DEFF}{rd^2}$$

where  $z_{\alpha}$  = Z score for alpha, set at 0.05

$z_{\beta}$  = Z score for power, set at 0.80

$p_A$  = the proportion with the outcome at baseline (and  $q_A = 1 - p_A$ )

$p_B$  = the proportion with the outcome at endline (and  $q_B = 1 - p_B$ )

$\bar{p} = (p_A + p_B)/2$  and  $\bar{q} = 1 - \bar{p}$

$\rho$  = estimated correlation among repeated observations

$d$  = minimum detectable difference between baseline and endline (calculated as

$p_B - p_A$ )

$DEFF$  = Design effect

### 3. Diggle's formula for repeated response

$$n = \frac{2(z_{\alpha} + z_{\beta})^2 \sigma^2 \{1 + (r - 1)\rho\} * DEFF}{rd^2}$$

where  $z_{\alpha}$  = Z score for alpha, set at 0.05

$z_{\beta}$  = Z score for power, set at 0.80

$\sigma$  = standard deviation of the response

$r$  = number of repeated observations

$\rho$  = estimated correlation among repeated observations

$d$  = minimum detectable difference between baseline and endline

*DEFF* = Design effect

For peer review only

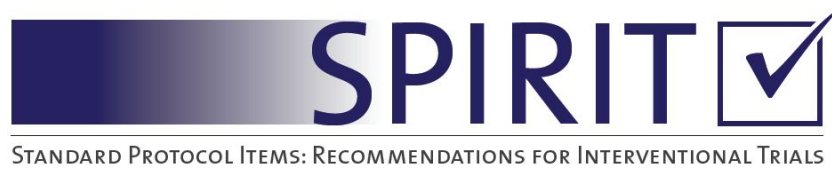

SPIRIT 2013 Checklist: Recommended items to address in a clinical trial protocol and related documents\*

| Section/item                      | Item No | Description                                                                                                                                                                                                                                                                                                                                                                                                                                                                                                                                                                                                                                                                      |
|-----------------------------------|---------|----------------------------------------------------------------------------------------------------------------------------------------------------------------------------------------------------------------------------------------------------------------------------------------------------------------------------------------------------------------------------------------------------------------------------------------------------------------------------------------------------------------------------------------------------------------------------------------------------------------------------------------------------------------------------------|
| <b>Administrative information</b> |         |                                                                                                                                                                                                                                                                                                                                                                                                                                                                                                                                                                                                                                                                                  |
| Title                             | 1       | Protocol of a randomized clinical trial to integrate mental health services into primary care for post-conflict populations in Northern Sri Lanka (COMGAP-S)                                                                                                                                                                                                                                                                                                                                                                                                                                                                                                                     |
| Trial registration                | 2a      | ISRCTN registry ISRCTN62598070, 1 Sept 2017. SLCTR registration number: SLCTR/2018/008, 27 Feb 2018.                                                                                                                                                                                                                                                                                                                                                                                                                                                                                                                                                                             |
| Protocol version                  | 3       | 11 November 2017, version 2                                                                                                                                                                                                                                                                                                                                                                                                                                                                                                                                                                                                                                                      |
| Funding                           | 4       | The research undertaken is supported by the Centers for Disease Control and Prevention, Cooperative Agreement Number, 1U01GH001654-01                                                                                                                                                                                                                                                                                                                                                                                                                                                                                                                                            |
| Roles and responsibilities        | 5a      | Shannon Doherty, PhD, Anglia Ruskin University, Cambridge, United Kingdom;<br>Giselle Dass, THEME Institute, Colombo, Sri Lanka;<br>Anne Edward, THEME Institute, Colombo, Sri Lanka;<br>Robert Stewart, MD, King's College London, United Kingdom;<br>Bayard Roberts, PhD, London School of Hygiene and Tropical Medicine, United Kingdom;<br>Melanie Abas, PhD, King's College London, United Kingdom<br><br>CS and SD developed the concept and design of this study with contributions from GD, AE, BR, RS and MA. CS and SD wrote the manuscript with contributions from GD, AE, BR, RS and MA. All authors commented on and approved the final version of this manuscript. |
|                                   | 5b      | Anglia Ruskin University, Faculty of Health, Education, Medicine, and Social Care, 4 <sup>th</sup> Floor William Harvey Building, Bishop Hall Lane, Chelmsford, UK, CM11SQ                                                                                                                                                                                                                                                                                                                                                                                                                                                                                                       |

1  
2  
3  
4  
5  
6  
7  
8  
9  
10  
11  
12  
13  
14  
15  
16  
17  
18  
19  
20  
21  
22  
23  
24  
25  
26  
27  
28  
29  
30  
31  
32  
33  
34  
35  
36  
37  
38  
39  
40  
41  
42  
43  
44  
45  
46  
47  
48  
49  
50  
51  
52  
53  
54  
55  
56  
57  
58  
59  
60

5c The Funding organization was involved in consultations regarding the scientific validity of the design, analysis of the data, preparation and review of the manuscript for publication. The Northern Ministry of Health, Sri Lanka was involved in management of the data collection. The University of Jaffna, Sri Lanka was involved in consultations on the design of the study, collection and interpretation of data, preparation and review of the manuscript for publication. RS is part-funded by: i) the National Institute for Health Research (NIHR) Biomedical Research Centre at the South London and Maudsley NHS Foundation Trust and King's College London; ii) a Medical Research Council (MRC) Mental Health Data Pathfinder Award to King's College London; iii) an NIHR Senior Investigator Award.

5d **Composition, roles, and responsibilities of the coordinating centre, steering committee, endpoint adjudication committee, data management team, and other individuals or groups overseeing the trial, if applicable (see Item 21a for data monitoring committee)**

## Introduction

### Background and rationale

6a The aim of COMGAP-S is to investigate if implementation of WHO mhGAP training within primary care settings increases identification and treatment of mental disorders for post-conflict populations in Northern Province, Sri Lanka.

6b Facilities are randomized using standardized randomization techniques to allocate facilities to the training sequence within the stepped wedge design. The stepped wedge cluster design is more logistically feasible in the post-conflict setting of Northern Sri Lanka.

### Objectives

7 The aim of COMGAP-S is to investigate if implementation of WHO mhGAP training within primary care settings increases identification and treatment of mental disorders for post-conflict populations in Northern Province, Sri Lanka.

### Trial design

8 Randomised clinical trial using stepped wedge cluster design; pragmatic trial

## Methods: Participants, interventions, and outcomes

### Study setting

9 23 government primary care health facilities within the five districts of the Northern Province, Sri Lanka: Jaffna, Mannar, Kilinochchi, Vavunia, and Mullaitivu  
Full list of participating sites can be obtained from the Primary Investigator or from the offices of THEME Institute, Colombo, Sri Lanka

## Eligibility criteria 10

**Inclusion criteria**

Facilities are included if they indicate willingness to participate, are located in any of the five districts of Northern Province (Jaffna, Mannar, Kilinochchi, Vavunia, Mullaitivu), provide primary care services, and are either divisional hospitals of type A, B & C or primary medical care units. Facilities should also provide services to conflict-affected, previously displaced populations.

Primary care practitioners are included if they have full registration with the Sri Lankan Medical Council, have at least 6 months or more until their next transfer rotation, or 6 months to retirement. Public health professionals are included if they have at least 6 months left on their transfer rotation, or 6 months to retirement. Community representatives located within the catchment area of each selected facility are included after identification through local registration organisations. Patients are included if they are 18 years or older, attend selected facilities, and belong to internally displaced or conflict-affected populations.

**Exclusion criteria**

Larger facilities such as district hospitals and teaching hospitals are excluded as they are not part of the primary care system. Private facilities are excluded due to the lack of an official registry.

Primary care practitioners, public health professionals, and community representatives are excluded if they have secondary mental health training. Patients under 18 years and those diagnosed with mental disorders outside of depression and/or anxiety are excluded.

view only



## Interventions

11a

## Primary Care Practitioners

Primary care practitioners in each selected facility undergo one month of monitoring prior to training to establish a baseline. They receive a paper booklet to record information on patients identified, treated, managed, and/or referred for mental health disorders. Further, before training, primary care practitioners recruit up to eight patients using provided inclusion and exclusion criteria to have their diagnosis verified by a psychiatrist. Members of the research team provide patients with information sheets and obtain informed consent. Patients complete a brief socio-demographic questionnaire at point of recruitment and the Hopkins Symptom Checklist-25 screening questionnaire for depression and anxiety at point of recruitment, and at 3 and 6 months follow-up to establish a baseline, and determine if patient outcomes change after training of primary care practitioners. Primary care practitioners are asked detailed questions about their management and treatment of recruited patients, and patients are asked about any treatments undertaken or medications prescribed to understand any intervening factors between baseline, and 3 and 6 months follow-up.

After the one-month monitoring period, primary care practitioners undergo a 3-day training intervention delivered in their primary care facility. Trained members of the research team deliver training at each selected facility to minimize disruption of work at facilities. After the one-month monitoring period primary care practitioners continue to use paper booklets to record their experience of the training implementation for six weeks. At this point (three months post-training) primary care practitioners participate in a 1-day refresher course and continue to use the experience of training implementation application for a further three months. At six months post-training, primary care practitioners take a second 1-day refresher course.

## Public Health Professionals

Public health professionals in each selected facility undergo one month of monitoring prior to training to establish a baseline. Each enrolled public health professional records information in a paper booklet on facilitation of referral and follow-up practices for mental health patients, and supporting primary care practitioners with patient management activities. After the one-month monitoring period, public health professionals are provided with a tailored 3-day training programme on mental health awareness, management, referral, and stigma reduction. After training, public health professionals undergo one month of monitoring and record the same information as in the pre-monitoring period to see how/if practice has changed. Research team members visit or telephone their facility once a week to monitor implementation of the training intervention.

After the one-month, monitoring period public health professionals record information on their experience of the training intervention for six weeks. At this point (three months post-training), public health professionals participate in a 1-day refresher course and continue to use the paper booklets to record their experience of training implementation for a further three months. At six months post-training, public health professionals take a second 1-day refresher course

After completion of training, monitoring of primary care practitioners continues for one month, where they continue to use the paper booklet to record information on patients they identify, treat, manage, and/or refer for common mental health disorders. Research team members visit or telephone the primary care practitioners once a week at their facility to monitor implementation of the training intervention. Interventions for each group with sufficient detail to allow replication, including how and when they will be administered

1  
2  
3  
4  
5  
6  
7  
8  
9  
10  
11  
12  
13  
14  
15  
16  
17  
18  
19  
20  
21  
22  
23  
24  
25  
26  
27  
28  
29  
30  
31  
32  
33  
34  
35  
36  
37  
38  
39  
40  
41  
42  
43  
44  
45  
46  
47  
48  
49  
50  
51  
52  
53  
54  
55  
56  
57  
58  
59  
60

Community representatives  
Community representatives undergo one month of monitoring prior to training to establish a baseline. Each enrolled community representative records information in a paper booklet on mental health awareness raising activities undertaken, and any referrals of people they encounter with mental health issues. After the one-month monitoring period, community representatives participate in a tailored 1-day training programme on mental health awareness, stigma reduction, and finding local resources. After training, community representatives undergo one month of monitoring and record the same information as in the pre-monitoring period to see how/if practice has changed. Research team members visit or telephone once a week to monitor implementation of the training intervention.

After the one-month, monitoring period community representatives' record information on their experience of the training intervention in paper booklets for six weeks. At this point (three months post-training), community representatives participate in a half-day refresher course and continue to use provided booklets to record their experience of training implementation for a further three months. At six months post-training, community representatives participate in a second half-day refresher course.

- 11b Participant request, external circumstances, force majeure
- 11c Monitoring and supervision for healthcare professionals and community representatives
- 11d Healthcare professionals and community representatives - N/A  
Patients - no restrictions on care, information gathered only

Outcomes

- 12 Primary outcomes
  - 1. 30% increase in patients identified, treated and referred to specialist care for mental disorders of interest by primary care practitioners.
  - 2. 40% minimum concurrence between diagnoses of patients identified with mental disorders of interest by trained primary care practitioners and psychiatrists as compared to diagnosis of patients pre-training (baseline) measured using qualitative interviews.
  - 3. 20% reduction in positive screening for depression and anxiety in patients pre-training and at 3 and 6 months follow-up time points, measured using the Hopkins Symptom-Checklist 25.
- Secondary outcomes
  - 1. 20% increase between mean pre- and post-training test scores for primary care practitioners using the WHO mhGAP 2.0 pre/post training test.
  - 2. At least 50% reduction of mental health stigma measured using AMIQ in primary care practitioner, public health professional, and community representative participant groups at training, and 3- and 6-month follow-up.
  - 3. At least 40% of primary care practitioners and public health professionals in the region will be delivered training on mhGAP, and at least 2 community representatives from each facility catchment areas will receive tailored training on mental health awareness and stigma reduction.

|    |             |    |                                                                        |
|----|-------------|----|------------------------------------------------------------------------|
| 1  |             |    |                                                                        |
| 2  | Participant | 13 | Figures 1, 2, 3 of the manuscript                                      |
| 3  | timeline    |    |                                                                        |
| 4  |             |    |                                                                        |
| 5  | Sample size | 14 | 23 primary care practitioners, 75 public health professionals, 50      |
| 6  |             |    | community representatives, and 200 patients. Target sample sizes       |
| 7  |             |    | were calculated separately for each participant group and for each     |
| 8  |             |    | outcome. Sample sizes for the first and second outcomes were           |
| 9  |             |    | calculated following methods described by Hemming and Taljaard,        |
| 10 |             |    | where each outcome is considered an individually randomized trial      |
| 11 |             |    | and then multiplied by a design effect to account for the stepped      |
| 12 |             |    | wedge design. Sample sizes for the third and fourth outcomes were      |
| 13 |             |    | calculated using formulae from the 1994 textbook "Analysis of          |
| 14 |             |    | Longitudinal Data" by Diggle, Liang and Zeger. (For full citations see |
| 15 |             |    | manuscript references.)                                                |
| 16 |             |    |                                                                        |
| 17 |             |    |                                                                        |
| 18 |             |    |                                                                        |
| 19 | Recruitment | 15 | Support letters from Provincial Department of Health Service, and      |
| 20 |             |    | Regional Divisional Health Secretariats in each district of Northern   |
| 21 |             |    | Province are used to approach primary care practitioners and public    |
| 22 |             |    | health professionals. Community representatives are recruited          |
| 23 |             |    | through local registration organizations. Patients are recruited by    |
| 24 |             |    | primary care practitioners.                                            |
| 25 |             |    |                                                                        |
| 26 |             |    |                                                                        |
| 27 |             |    |                                                                        |

### Methods: Assignment of interventions (for controlled trials)

#### Allocation:

|    |                |     |                                                                       |
|----|----------------|-----|-----------------------------------------------------------------------|
| 31 |                |     |                                                                       |
| 32 | Sequence       | 16a | Facilities are randomized using standardized randomization            |
| 33 | generation     |     | techniques to allocate facilities to the training sequence within the |
| 34 |                |     | stepped wedge design. Patients and community representatives were     |
| 35 |                |     | not randomized.                                                       |
| 36 |                |     |                                                                       |
| 37 | Allocation     | 16b | N/A - crossover design                                                |
| 38 | concealment    |     |                                                                       |
| 39 | mechanism      |     |                                                                       |
| 40 |                |     |                                                                       |
| 41 |                |     |                                                                       |
| 42 | Implementation | 16c | Team members from the THEME Institute generate allocation using a     |
| 43 |                |     | random numbers generator, approach and enrol participants             |
| 44 |                |     |                                                                       |
| 45 | Blinding       | 17a | N/A - crossover design                                                |
| 46 | (masking)      |     |                                                                       |
| 47 |                |     |                                                                       |
| 48 |                | 17b | N/A - crossover design                                                |
| 49 |                |     |                                                                       |

### Methods: Data collection, management, and analysis

|    |                                 |     |                                                                          |
|----|---------------------------------|-----|--------------------------------------------------------------------------|
| 1  |                                 |     |                                                                          |
| 2  | Data collection                 | 18a | Measures are collected at six time points:                               |
| 3  | methods                         |     | 1. Pre-training monitoring period: questionnaire to establish a baseline |
| 4  |                                 |     | on current practice. Primary care practitioners only: recruitment of     |
| 5  |                                 |     | patients for diagnosis verification.                                     |
| 6  |                                 |     | Patients administered Hopkins Symptom Checklist 25 for anxiety           |
| 7  |                                 |     | and/or depression (baseline), and at 3 and 6 months follow-up to         |
| 8  |                                 |     | assess change in clinical symptoms.                                      |
| 9  |                                 |     | 2. Pre-training intervention: WHO mhGAP knowledge pre-test and           |
| 10 |                                 |     | AMIQ stigma questionnaire.                                               |
| 11 |                                 |     | 3. Post-training intervention: second administration of WHO mhGAP        |
| 12 |                                 |     | knowledge test.                                                          |
| 13 |                                 |     | 4. Post-training monitoring period: questionnaire to establish if/how    |
| 14 |                                 |     | practice has changed, and qualitative interviews to reflect on initial   |
| 15 |                                 |     | diagnosis practice.                                                      |
| 16 |                                 |     | 5. 3 months follow-up training: WHO mhGAP pre- and post-                 |
| 17 |                                 |     | knowledge test and AMIQ stigma questionnaire.                            |
| 18 |                                 |     | 6. 6 months follow-up training: WHO mhGAP pre- and post-                 |
| 19 |                                 |     | knowledge test and AMIQ stigma questionnaire.                            |
| 20 |                                 |     |                                                                          |
| 21 |                                 |     |                                                                          |
| 22 |                                 |     |                                                                          |
| 23 |                                 |     |                                                                          |
| 24 |                                 | 18b | N/A - discontinued participants not subject to follow-up                 |
| 25 |                                 |     |                                                                          |
| 26 | Data                            | 19  | Data is collected on tablets and uploaded to a secure server. Data is    |
| 27 | management                      |     | cleaned and checked throughout the trial. Paper records are scanned      |
| 28 |                                 |     | in by local research team members and held on secure desktop             |
| 29 |                                 |     | computers and a password-protected hard drive.                           |
| 30 |                                 |     |                                                                          |
| 31 |                                 |     |                                                                          |
| 32 | Statistical                     | 20a | An intention-to-treat analysis will be used. Analysis will include       |
| 33 | methods                         |     | generalized linear regression modules to adjust for repeated             |
| 34 |                                 |     | measures and descriptive analytics.                                      |
| 35 |                                 |     |                                                                          |
| 36 |                                 | 20b | N/A                                                                      |
| 37 |                                 |     |                                                                          |
| 38 |                                 | 20c | N/A                                                                      |
| 39 |                                 |     |                                                                          |
| 40 | <b>Methods: Monitoring</b>      |     |                                                                          |
| 41 |                                 |     |                                                                          |
| 42 | Data monitoring                 | 21a | Composition of data monitoring committee (DMC); summary of its role      |
| 43 |                                 |     | and reporting structure; statement of whether it is independent from     |
| 44 |                                 |     | the sponsor and competing interests; and reference to where further      |
| 45 |                                 |     | details about its charter can be found, if not in the protocol.          |
| 46 |                                 |     | Alternatively, an explanation of why a DMC is not needed                 |
| 47 |                                 |     |                                                                          |
| 48 |                                 |     |                                                                          |
| 49 |                                 | 21b | N/A                                                                      |
| 50 |                                 |     |                                                                          |
| 51 |                                 |     |                                                                          |
| 52 | Harms                           | 22  | Plans for collecting, assessing, reporting, and managing solicited and   |
| 53 |                                 |     | spontaneously reported adverse events and other unintended effects       |
| 54 |                                 |     | of trial interventions or trial conduct                                  |
| 55 |                                 |     |                                                                          |
| 56 | Auditing                        | 23  | N/A                                                                      |
| 57 |                                 |     |                                                                          |
| 58 | <b>Ethics and dissemination</b> |     |                                                                          |
| 59 |                                 |     |                                                                          |
| 60 |                                 |     |                                                                          |

|    |                               |     |                                                                                                                                                                                                                                                                                                                                                                                                                                |
|----|-------------------------------|-----|--------------------------------------------------------------------------------------------------------------------------------------------------------------------------------------------------------------------------------------------------------------------------------------------------------------------------------------------------------------------------------------------------------------------------------|
| 1  |                               |     |                                                                                                                                                                                                                                                                                                                                                                                                                                |
| 2  | Research ethics approval      | 24  | Ethical approval has been received from the Faculty of Health, Education, Medicine and Social Care, Anglia Ruskin University, UK (SC/jc/FMFREP/16/17 076), from the Faculty of Medicine, University of Jaffna, Sri Lanka (J/ERC/17/81/NDR/0170) and non-engagement approval from the funding body, the Centers for Disease Control and Prevention (2018-015).                                                                  |
| 3  |                               |     |                                                                                                                                                                                                                                                                                                                                                                                                                                |
| 4  |                               |     |                                                                                                                                                                                                                                                                                                                                                                                                                                |
| 5  |                               |     |                                                                                                                                                                                                                                                                                                                                                                                                                                |
| 6  |                               |     |                                                                                                                                                                                                                                                                                                                                                                                                                                |
| 7  |                               |     |                                                                                                                                                                                                                                                                                                                                                                                                                                |
| 8  |                               |     |                                                                                                                                                                                                                                                                                                                                                                                                                                |
| 9  |                               |     |                                                                                                                                                                                                                                                                                                                                                                                                                                |
| 10 | Protocol amendments           | 25  | Changes to the protocol will be reported to the sponsor institution, the sponsor ethics panel, the in-country ethics board, and the funder.                                                                                                                                                                                                                                                                                    |
| 11 |                               |     |                                                                                                                                                                                                                                                                                                                                                                                                                                |
| 12 |                               |     |                                                                                                                                                                                                                                                                                                                                                                                                                                |
| 13 |                               |     |                                                                                                                                                                                                                                                                                                                                                                                                                                |
| 14 | Consent or assent             | 26a | Trained research team members perform screening and enrolment procedures and gain informed consent for each participant group following established study protocols.                                                                                                                                                                                                                                                           |
| 15 |                               |     |                                                                                                                                                                                                                                                                                                                                                                                                                                |
| 16 |                               |     |                                                                                                                                                                                                                                                                                                                                                                                                                                |
| 17 |                               |     |                                                                                                                                                                                                                                                                                                                                                                                                                                |
| 18 |                               |     |                                                                                                                                                                                                                                                                                                                                                                                                                                |
| 19 |                               | 26b | N/A                                                                                                                                                                                                                                                                                                                                                                                                                            |
| 20 | Confidentiality               | 27  | Data is collected on tablets and uploaded to a secure server. Paper records are scanned in by local research team members and held on secure desktop computers and a password-protected hard drive.                                                                                                                                                                                                                            |
| 21 |                               |     |                                                                                                                                                                                                                                                                                                                                                                                                                                |
| 22 |                               |     |                                                                                                                                                                                                                                                                                                                                                                                                                                |
| 23 |                               |     |                                                                                                                                                                                                                                                                                                                                                                                                                                |
| 24 |                               |     |                                                                                                                                                                                                                                                                                                                                                                                                                                |
| 25 | Declaration of interests      | 28  | No competing interests for primary investigator. RS (see authors) declares research support received in the last 5 years from Roche, Janssen, GSK and Takeda.                                                                                                                                                                                                                                                                  |
| 26 |                               |     |                                                                                                                                                                                                                                                                                                                                                                                                                                |
| 27 |                               |     |                                                                                                                                                                                                                                                                                                                                                                                                                                |
| 28 |                               |     |                                                                                                                                                                                                                                                                                                                                                                                                                                |
| 29 | Access to data                | 29  | Team members and selected staff from the funding body will have access to the full dataset.                                                                                                                                                                                                                                                                                                                                    |
| 30 |                               |     |                                                                                                                                                                                                                                                                                                                                                                                                                                |
| 31 |                               |     |                                                                                                                                                                                                                                                                                                                                                                                                                                |
| 32 |                               |     |                                                                                                                                                                                                                                                                                                                                                                                                                                |
| 33 | Ancillary and post-trial care | 30  | N/A                                                                                                                                                                                                                                                                                                                                                                                                                            |
| 34 |                               |     |                                                                                                                                                                                                                                                                                                                                                                                                                                |
| 35 |                               |     |                                                                                                                                                                                                                                                                                                                                                                                                                                |
| 36 | Dissemination policy          | 31a | Trial results and analyses will be purposefully communicated to the Provincial Department of Health Service, Regional Divisional Health Secretariats in the five districts, participating healthcare professionals and community representatives. Dissemination events will be held with the University of Jaffna. Activities will include publications and presentations to general and specialized audience by team members. |
| 37 |                               |     |                                                                                                                                                                                                                                                                                                                                                                                                                                |
| 38 |                               |     |                                                                                                                                                                                                                                                                                                                                                                                                                                |
| 39 |                               |     |                                                                                                                                                                                                                                                                                                                                                                                                                                |
| 40 |                               |     |                                                                                                                                                                                                                                                                                                                                                                                                                                |
| 41 |                               |     |                                                                                                                                                                                                                                                                                                                                                                                                                                |
| 42 |                               |     |                                                                                                                                                                                                                                                                                                                                                                                                                                |
| 43 |                               |     |                                                                                                                                                                                                                                                                                                                                                                                                                                |
| 44 |                               |     |                                                                                                                                                                                                                                                                                                                                                                                                                                |
| 45 |                               | 31b | N/A                                                                                                                                                                                                                                                                                                                                                                                                                            |
| 46 |                               |     |                                                                                                                                                                                                                                                                                                                                                                                                                                |
| 47 |                               | 31c | The research dataset and statistical analyses will be available by request from the primary investigator.                                                                                                                                                                                                                                                                                                                      |
| 48 |                               |     |                                                                                                                                                                                                                                                                                                                                                                                                                                |
| 49 |                               |     |                                                                                                                                                                                                                                                                                                                                                                                                                                |

## Appendices

|    |                            |    |                                                                                                    |
|----|----------------------------|----|----------------------------------------------------------------------------------------------------|
| 52 | Informed consent materials | 32 | Model consent form and other related documentation given to participants and authorised surrogates |
| 53 |                            |    |                                                                                                    |
| 54 |                            |    |                                                                                                    |
| 55 |                            |    |                                                                                                    |
| 56 | Biological specimens       | 33 | N/A                                                                                                |
| 57 |                            |    |                                                                                                    |

\*It is strongly recommended that this checklist be read in conjunction with the SPIRIT 2013 Explanation & Elaboration for important clarification on the items. Amendments to the

1 protocol should be tracked and dated. The SPIRIT checklist is copyrighted by the SPIRIT  
2 Group under the Creative Commons "[Attribution-NonCommercial-NoDerivs 3.0 Unported](#)"  
3 license.  
4  
5  
6  
7  
8  
9  
10  
11  
12  
13  
14  
15  
16  
17  
18  
19  
20  
21  
22  
23  
24  
25  
26  
27  
28  
29  
30  
31  
32  
33  
34  
35  
36  
37  
38  
39  
40  
41  
42  
43  
44  
45  
46  
47  
48  
49  
50  
51  
52  
53  
54  
55  
56  
57  
58  
59  
60

For peer review only

# BMJ Open

## Protocol of a randomized clinical trial to integrate mental health services into primary care for post-conflict populations in Northern Sri Lanka (COMGAP-S)

|                                 |                                                                                                                                                                                                                                                                                                                                                                                                                                                                |
|---------------------------------|----------------------------------------------------------------------------------------------------------------------------------------------------------------------------------------------------------------------------------------------------------------------------------------------------------------------------------------------------------------------------------------------------------------------------------------------------------------|
| Journal:                        | <i>BMJ Open</i>                                                                                                                                                                                                                                                                                                                                                                                                                                                |
| Manuscript ID                   | bmjopen-2021-051441.R1                                                                                                                                                                                                                                                                                                                                                                                                                                         |
| Article Type:                   | Protocol                                                                                                                                                                                                                                                                                                                                                                                                                                                       |
| Date Submitted by the Author:   | 08-Sep-2021                                                                                                                                                                                                                                                                                                                                                                                                                                                    |
| Complete List of Authors:       | Doherty, Shannon; Anglia Ruskin University<br>Dass, Giselle; THEME Institute, 50, 13 Old Kesbewa Road, Nugegoda<br>Edward, Anne; THEME Institute, 50, 13 Old Kesbewa Road, Nugegoda<br>Stewart, Robert; King's College London, Institute of Psychiatry<br>Roberts, Bayard; London School of Hygiene and Tropical Medicine,<br>Abas, Melanie; Institute of Psychiatry, King's College London, Section of<br>Epidemiology, Health Services & Population Research |
| <b>Primary Subject Heading</b>: | Global health                                                                                                                                                                                                                                                                                                                                                                                                                                                  |
| Secondary Subject Heading:      | Health services research, Mental health                                                                                                                                                                                                                                                                                                                                                                                                                        |
| Keywords:                       | MENTAL HEALTH, PRIMARY CARE, PSYCHIATRY                                                                                                                                                                                                                                                                                                                                                                                                                        |
|                                 |                                                                                                                                                                                                                                                                                                                                                                                                                                                                |

SCHOLARONE™  
Manuscripts

1  
2  
3 **Title:** Protocol of a randomized clinical trial to integrate mental health services into primary care  
4  
5 for post-conflict populations in Northern Sri Lanka (COMGAP-S)  
6  
7  
8  
9  
10

11 **Authors:** Shannon Doherty, PhD, Anglia Ruskin University, Cambridge, United Kingdom;  
12  
13 Giselle Dass, THEME Institute, Colombo, Sri Lanka; Anne Edward, THEME Institute, Colombo,  
14  
15 Sri Lanka; Robert Stewart, MD, King's College London, United Kingdom; Bayard Roberts, PhD,  
16  
17 London School of Hygiene and Tropical Medicine, United Kingdom; Melanie Abas, PhD, King's  
18  
19 College London, United Kingdom  
20  
21  
22  
23  
24  
25

26 **Corresponding Author:** Shannon Doherty, PhD, Anglia Ruskin University, Bishop Hall Lane,  
27  
28 Chelmsford, UK, CM1 1SQ, shannon.doherty@anglia.ac.uk, +44 75 2212 8409  
29  
30  
31  
32  
33  
34  
35  
36  
37  
38  
39  
40  
41  
42  
43  
44  
45  
46  
47  
48  
49  
50  
51  
52  
53  
54  
55  
56  
57  
58  
59  
60



## ABSTRACT

### Introduction

Sri Lanka has a long history of armed conflict and natural disasters increasing risk of mental health disorders in the population. Due to a lack of specialist services, there is a treatment gap between those seeking and those able, to access mental health services. The aim of this research programme is to integrate mental health services into primary care to meet the needs of this post-conflict population.

### Methods and analysis

This is a stepped wedge cluster design randomized clinical trial of the World Health Organisation mhGAP primary care mental health training intervention. We will provide a 10-day training to primary care practitioners of 23 randomly selected primary care facilities aimed at increasing their ability to identify, treat, and manage common mental health disorders. Public health professionals and community representatives will receive a tailored training intervention to increase mental health awareness. Refresher courses will occur at 3- and 6-months post-training. Supervision and monitoring will occur for one month pre- and post-training. Target sample sizes have been calculated separately for each group of participants and for each outcome.

### Ethics and dissemination

This trial has received ethical approval from the Faculty of Health, Education, Medicine and Social Care, Anglia Ruskin University, UK (SC/jc/FMFREP/16/17 076), from the Faculty of Medicine, University of Jaffna, Sri Lanka (J/ERC/17/81/NDR/0170) and non-engagement approval from the funding body, the Centers for Disease Control and Prevention (2018-015). All participants gave written consent.

Dissemination of study results will be completed through publication of academic articles, conference presentations, townhall meetings, written pamphlets in plain language, reports to Ministry of Health and other government organisations, and through social media outlets.

## Trial Registration

ISRCTN registry ISRCTN62598070, 1 Sept 2017. SLCTR registration number: SLCTR/2018/008, 27 Feb 2018.

## Abbreviations

WHO mhGAP - World Health Organization's mental health Gap Action Programme

LMIC - Low- and middle-income countries

## Keywords

Conflict, clinical trial, health systems, mental health, mhGAP

## Strengths and limitations of this study

- First study to culturally adapt all World Health Organisation mhGAP written and video training materials
- Seeks to demonstrate feasibility of using World Health Organisation mhGAP materials to train non-specialists
- Multiple refresher sessions should increase knowledge retention among participants
- Representative sample means findings could be generalized to other areas of Northern Sri Lanka
- Limited to publicly available healthcare facilities as private facilities were excluded

**Word count: 3,957**

## INTRODUCTION

1  
2  
3 Mental health disorders often present in primary care settings, especially in low- and middle-  
4 income countries (LMIC), where specialized psychiatric services may be lacking. Low- or non-  
5 detection, low referral rates for specialist care, and increased costs are all features of mental  
6 health disorders in primary care settings in LMIC. Furthermore, lack of adequate training for  
7 primary care physicians and lack of involvement of public health personnel can act as barriers to  
8 effective treatment and management of common mental health disorders in primary care [1, 2].  
9  
10 Barriers can be compounded in post-conflict situations, as existing limited health systems may be  
11 severely affected, especially for those internally displaced. There is strong evidence that conflict-  
12 driven, internally displaced migrants have increased rates of mental health disorders [1, 3].  
13  
14  
15  
16  
17  
18  
19  
20  
21  
22  
23

24 During 26 years of protracted internal conflict in Sri Lanka, more than 100,000 people of all  
25 ethnicities are estimated to have died, and hundreds of thousands injured [4, 5]. The substantial  
26 internal displacement from conflict was compounded by the 2004 tsunami [6].  
27  
28  
29  
30  
31

32 Although Sri Lanka has a very effective primary care system, the treatment gap for mental health  
33 is extensive, especially for post-conflict populations [1, 7]. While provision of health services has  
34 improved, resources are insufficient to meet population needs, especially those related to severity  
35 of trauma, or to difficulties experienced in displacement or return migration [8]. Primary care  
36 practitioners in the Northern Province region regularly spearhead mental health care efforts,  
37 however, they do so without adequate training. Training primary care practitioners to deliver  
38 mental health care at primary care level is in line with the task-shifting approach in the global  
39 mental health field [2, 9-11]. A pilot feasibility study (COMGAP) to explore this possibility was  
40 conducted in 2013-2014 based on a peer-reviewed protocol and is reported elsewhere [8].  
41  
42  
43  
44  
45  
46  
47  
48  
49  
50  
51

52  
53  
54 The first phase of the study was completed in 2015-2016 and facilitated understanding of the  
55 mental disorder burden and treatment gap at primary care level. Results from the cross-sectional  
56  
57  
58  
59  
60

1  
2  
3 study indicated the most prevalent mental health disorders in primary care settings were  
4 depression (41.1%, 95% CI: 38.7-44.5%), anxiety (46.7%, 95% CI: 41.9-51.5%), post-traumatic  
5 stress disorder (13.7%, 95% CI: 10.6-16.8%), and psychosis with hypomania (17.6%, 95 CI: 13.3-  
6 21.9) [12]. While this facilitated understanding of the underlying mental health issues within the  
7 region, the issue of unmet need was still present. In this context, the aim of Phase 2 of COMGAP-  
8 S is to use a scaled-up training intervention based on the World Health Organization Mental  
9 Health Gap Action Programme (WHO mhGAP 2.0) to integrate mental health services into  
10 primary care by providing training to primary care practitioners and public health professionals  
11 serving conflict-affected populations in primary care settings in the Northern Province [12, 13].  
12 The second phase of the project was conducted between 2016-2021. COMGAP-S is the first  
13 large-scale trial in the region to use mhGAP to integrate mental health services into primary care  
14 for conflict-affected populations. Further, it is the only trial to include wider health care staff and  
15 community members as part of a long-term strategy to improve mental health awareness and  
16 stigma reduction.  
17  
18  
19  
20  
21  
22  
23  
24  
25  
26  
27  
28  
29  
30  
31  
32  
33  
34

### 35 **Aims and objectives**

36  
37 The aim of COMGAP-S is to investigate if implementation of WHO mhGAP training within primary  
38 care settings increases identification and treatment of common mental disorders for post-conflict  
39 populations in Northern Province, Sri Lanka.  
40  
41  
42

#### 43 Primary outcomes

- 44  
45 1. 30% increase in patients identified and treated for common mental health disorders, and  
46 referrals to specialist care for complex mental disorders by primary care practitioners. Measured  
47 at baseline using the pre/post-monitoring questionnaires on current practice with mental health  
48 patients and compared to post-training practice.  
49
- 50  
51 2. 40% minimum concurrence between diagnoses of patients identified with mental disorders of  
52 interest by trained primary care practitioners and psychiatrists as compared to diagnosis of  
53  
54  
55  
56  
57  
58  
59  
60

1  
2  
3 patients pre-training (baseline) measured using quantitative reporting forms from the consultant  
4 psychiatrist and in-depth, individual interviews with trained primary care practitioners to  
5 understand any changes in practice.  
6  
7

8  
9 3. 20% reduction in positive screening for depression and anxiety in patients pre-training and at  
10 3- and 6-months follow-up time points, measured using the Hopkins Symptom-Checklist 25.  
11  
12

### 13 Secondary outcomes

14  
15 1. 20% increase between mean pre- and post-training test scores for primary care practitioners  
16 using the WHO mhGAP 2.0 pre/post training test.  
17  
18

19 2. At least 50% reduction of mental health stigma measured using Attitudes to Mental Illness  
20 Questionnaire (AMIQ) in primary care practitioner, public health professional, and community  
21 representative participant groups at training, and 3- and 6-month follow-up. Prevalence rates were  
22 based on previous mental health studies conducted within the country [1,5].  
23  
24  
25  
26

27 3. At least 40% of primary care practitioners and public health professionals in the region will be  
28 delivered training on mhGAP, and at least 2 community representatives from each facility  
29 catchment areas will receive tailored training on mental health awareness and stigma reduction.  
30  
31  
32  
33  
34  
35  
36  
37  
38  
39  
40

## 41 METHODS AND ANALYSIS

### 42 Study design

43  
44 This is a randomized clinical trial using a stepped wedge cluster design [14]. This design  
45 comprises a preliminary period where no clusters (healthcare facilities) are exposed to the  
46 intervention, then at regular intervals, one cluster is randomized to cross from control to  
47 intervention. This continues until all clusters have been exposed [14]. The stepped wedge design  
48  
49  
50  
51  
52  
53  
54  
55  
56  
57  
58  
59  
60

1  
2  
3 is increasingly utilized as a way to evaluate interventions that involve service delivery and involves  
4 sequential and random crossover of clusters (facilities) from control (delivery of standard care) to  
5 intervention (mhGAP training) until all clusters are exposed [14]. The stepped wedge design takes  
6 into account the logistical constraints of needing to sequentially roll out the intervention by training  
7 one facility at a time enabling us to understand how this intervention can be implemented in the  
8 future on a larger scale. This design was chosen because: 1) in an intervention trying to integrate  
9 mental health services into primary care for post-conflict populations it is unethical to use a parallel  
10 design which prevents equal distribution of knowledge and skills; 2) the stepped wedge cluster  
11 design is more logistically feasible in the post-conflict setting of Northern Sri Lanka [15].  
12  
13  
14  
15  
16  
17  
18  
19  
20  
21  
22  
23

24 Facilities will be randomized using standardized randomization techniques to allocate facilities to  
25 the training sequence within the stepped wedge design. Patients and community representatives  
26 will not be randomized. The study team cannot be blinded to the allocation of facilities. However,  
27 the study psychiatrist will be masked to the randomization status of facilities from which patients  
28 originate. Patients will also be blinded to facility randomization status. [1]  
29  
30  
31  
32  
33  
34  
35  
36

37 There is a theoretical possibility of contamination due to close professional or personal networks  
38 between participant groups and geographical location of facilities. However, this is not envisaged  
39 to exert significant influence on expected outcomes due to specifics of the extensive training,  
40 requirement to carry out intensive tasks, and low risk of contamination through informal  
41 discussions [1]. Potential contamination will be observed at all stages and taken into account at  
42 the end of the study. Further, an important strength of cluster sampling is that it helps mitigate the  
43 risk of treatment contamination between intervention and control groups.  
44  
45  
46  
47  
48  
49  
50  
51  
52  
53

## 54 **Setting**

55  
56  
57  
58  
59  
60

1  
2  
3 The study setting will be 23 government primary care health facilities within the five districts of the  
4 Northern Province: Jaffna, Mannar, Kilinochchi, Vavuniya, and Mullaitivu. A full list of participating  
5 sites can be obtained from the Primary Investigator or from the offices of THEME Institute,  
6 Colombo, Sri Lanka.  
7  
8  
9

10  
11 A list of public primary care facilities has been provided to the study team by the Northern Ministry  
12 of Health. A random number generator will be used to select 23 facilities across the 5 districts.  
13 Distribution of clusters will be allocated proportionally to the total numbers of internally displaced  
14 people in each district (districts with larger numbers were assigned more clusters). This will ensure  
15 adequate representation of conflict displacement and severity.  
16  
17  
18  
19  
20  
21  
22  
23

#### 24 **Inclusion criteria**

25  
26 Facilities will be included if they indicate willingness to participate, are located in any of the five  
27 districts of Northern Province (Jaffna, Mannar, Kilinochchi, Vavuniya, Mullaitivu), provide primary  
28 care services, and are either divisional hospitals of type A, B & C or primary medical care units.  
29  
30  
31  
32  
33  
34  
35  
36  
37  
38  
39  
40  
41  
42  
43  
44  
45  
46  
47  
48  
49  
50  
51  
52  
53  
54  
55  
56  
57  
58  
59  
60

Facilities should also provide services to conflict-affected, previously displaced populations.

Primary care practitioners will be included if they have full registration with the Sri Lankan Medical Council, have at least 6 months or more until their next transfer rotation, or 6 months to retirement.

Public health professionals will be included if they have at least 6 months left on their transfer rotation, or 6 months to retirement. Community representatives located within the catchment area of each selected facility will be included after identification through local registration organisations.

Patients will be included if they are 18 years or older, attend selected facilities, and belong to internally displaced or conflict-affected populations.

#### 54 **Exclusion criteria**

1  
2  
3 Larger facilities such as district hospitals and teaching hospitals will be excluded as they are not  
4 part of the primary care system. Private facilities will be excluded due to the lack of an official  
5 registry.  
6  
7  
8

9  
10  
11 Primary care practitioners, public health professionals, and community representatives will be  
12 excluded if they have secondary mental health training. Patients under 18 years and those  
13 diagnosed with mental disorders outside of depression and/or anxiety will be excluded.  
14  
15  
16  
17

### 18 19 20 **Recruitment and enrolment**

21  
22 Support letters from Provincial Department of Health Service, and Regional Divisional Health  
23 Secretariats in each district of Northern Province will be used to approach primary care  
24 practitioners and public health professionals. Community representatives will be recruited through  
25 local registration organizations. Patients will be recruited by primary care practitioners. Trained  
26 research team members will perform screening and enrolment procedures and gain informed  
27 consent for each participant group following established study protocols.  
28  
29  
30  
31  
32  
33  
34  
35  
36  
37  
38

### 39 **Structure and delivery of the intervention**

40  
41 Training material was adapted for local use and included translation and cultural adaption of  
42 relevant modules of the WHO mhGAP 2.0 IG, and production of locally adapted and developed  
43 mhGAP video material for the Tamil context [16]. This was completed in collaboration with local  
44 academics, psychiatrists, primary care practitioners, Northern Province Ministry of Health, and  
45 the University of Jaffna.  
46  
47  
48  
49

50  
51 Training will consist of delivery of written materials, role plays, and training videos. All training  
52 material was developed in collaboration with Sri Lankan researchers, local psychiatrists and  
53  
54  
55  
56  
57  
58  
59  
60



1  
2  
3 community physicians. All material was translated, back translated, and piloted for cultural  
4 appropriateness prior to administration in the full project.  
5

6  
7 Almost all the instruments used in the study had been previously applied in epidemiological  
8 studies within Sri Lanka and are available in Tamil, Sinhala, and English languages. New  
9 instruments were translated, back translated and adapted for cultural appropriateness in  
10 collaboration with the Sri Lankan research team. Further, the entire set of measures was field  
11 tested in a pilot study prior to the full study commencing. This pilot study examined if measures  
12 were understood by participants, culturally acceptable, and to ensure translations were correct.  
13  
14 To ensure safety of all participants, a local psychiatrist will be involved throughout the study to  
15 provide free mental health care if required.  
16  
17  
18  
19  
20  
21  
22  
23  
24  
25

#### 26 Primary care practitioners and patients

27  
28 Primary care practitioners (general physicians practicing in selected facilities) will undergo one  
29 month of monitoring prior to training to establish a baseline. Primary care practitioners will be  
30 trained using the mhGAP manual to recognize common mental health disorders using screening  
31 procedures, delivery brief psychosocial interventions (psychoeducation, Motivational  
32 Interviewing), and referral procedures for complex cases. They will receive a paper booklet to  
33 record information on patients identified, treated, managed, and/or referred for mental health  
34 disorders. Further, before training, primary care practitioners will be asked to recruit up to eight  
35 patients using provided inclusion and exclusion criteria to have anxiety and/or depression  
36 diagnoses verified by a psychiatrist. Members of the research team will provide patients with  
37 information sheets and consent forms available in all 3 official languages (English, Tamil, Sinhala)  
38 and obtain informed consent. Patients will complete a brief socio-demographic questionnaire at  
39 point of recruitment and the Hopkins Symptom Checklist-25 screening questionnaire for  
40 depression and anxiety at point of recruitment, and at 3- and 6-months follow-up to establish a  
41 baseline, and determine if patient outcomes change after training of primary care practitioners.  
42  
43  
44  
45  
46  
47  
48  
49  
50  
51  
52  
53  
54  
55  
56  
57

1  
2  
3 Primary care practitioners will be asked detailed questions about their management and treatment  
4 of recruited patients, and patients will be asked about any treatments undertaken or medications  
5 prescribed to understand any intervening factors between baseline, and 3- and 6-months follow-  
6 up.  
7  
8  
9  
10

11  
12  
13 After the one-month monitoring period, primary care practitioners will undergo a 3-day training  
14 intervention delivered in their primary care facility. Trained members of the research team will  
15 deliver training at each selected facility to minimize disruption of work at facilities.  
16  
17  
18  
19

20  
21  
22 After completion of training, monitoring of primary care practitioners will continue for one month,  
23 where they will continue to use the paper booklet to record information on patients they identify,  
24 treat, manage, for common mental health disorders and any cases they refer to specialized care  
25 Research team members will visit or telephone the primary care practitioners once a week at their  
26 facility to monitor implementation of the training intervention.  
27  
28  
29  
30  
31

32  
33  
34 After the one-month monitoring period primary care practitioners will continue to use paper  
35 booklets to record their experience of the training implementation for six weeks. At this point (three  
36 months post-training) primary care practitioners will participate in a 1-day refresher course and  
37 continue to use the experience of training implementation application for a further three months.  
38 At six months post-training, primary care practitioners will take a second 1-day refresher course  
39 (Figure 1).  
40  
41  
42  
43  
44  
45

46  
47 Supervision at all time points will be provided by research assistants who previously delivered  
48 training sessions. Supervision will consist of phone calls or visits to the clinics to understand if  
49 and how training is being utilised by participants.  
50  
51  
52  
53  
54

55  
56 Public health professionals  
57

1  
2  
3 Public health professionals (nurse attendants, midwives) in each selected facility will undergo one  
4 month of monitoring prior to training to establish a baseline. Public health professionals will be  
5 trained using adapted written materials from the mhGAP training to recognize signs of common  
6 mental health issues, provide basic psychosocial care (education) and refer onwards if needed.  
7 Each enrolled public health professional will record information in a paper booklet on facilitation  
8 of referral and follow-up practices for mental health patients, and support primary care  
9 practitioners with patient management activities. After the one-month monitoring period, public  
10 health professionals will be provided with a tailored 3-day training programme on mental health  
11 awareness, management, referral, and stigma reduction. After training, public health  
12 professionals will undergo one month of monitoring and record the same information as in the  
13 pre-monitoring period to see how/if practice has changed. Research team members will visit or  
14 telephone their facility once a week to monitor implementation of the training intervention.

15  
16  
17  
18  
19  
20  
21  
22  
23  
24  
25  
26  
27  
28  
29  
30  
31 After the one-month, monitoring period public health professionals will record information on their  
32 experience of the training intervention for six weeks. At this point (three months post-training),  
33 public health professionals will participate in a 1-day refresher course and continue to use the  
34 paper booklets to record their experience of training implementation for a further three months. At  
35 six months post-training, public health professionals will take a second 1-day refresher course  
36 (Figure 2).

37  
38  
39  
40  
41  
42  
43 Supervision at all time points will be provided by research assistants who delivered previous  
44 training sessions. Supervision will consist of phone calls or visits to the clinics to understand if  
45 and how training was being utilised by participants.

#### 51 Community representatives

52  
53  
54 Community representatives (teachers, social workers) will undergo one month of monitoring prior  
55 to training to establish a baseline. Community representatives will be trained using adapted

1  
2  
3 materials from the mhGAP training material to recognize signs of common mental illness, delivery  
4 basic psychosocial education and learn referral pathways and where to seek providers. Each  
5 enrolled community representative will record information in a paper booklet on mental health  
6 awareness raising activities undertaken, and any referrals of people they encounter with mental  
7 health issues. After the one-month monitoring period, community representatives will participate  
8 in a tailored 1-day training programme on mental health awareness, stigma reduction, and finding  
9 local resources. After training, community representatives will undergo one month of monitoring  
10 and record the same information as in the pre-monitoring period to see how/if practice has  
11 changed. Research team members will visit or telephone once a week to monitor implementation  
12 of the training intervention.  
13  
14  
15  
16  
17  
18  
19  
20  
21  
22  
23  
24  
25

26 After the one-month, monitoring period community representatives' will record information on their  
27 experience of the training intervention in paper booklets for six weeks. At this point (three months  
28 post-training), community representatives will participate in a half-day refresher course and  
29 continue to use provided booklets to record their experience of training implementation for a  
30 further three months. At six months post-training, community representatives will participate in a  
31 second half-day refresher course (Figure 3).  
32  
33  
34  
35  
36  
37  
38

39 Supervision at all time points will be provided by research assistants who delivered previous  
40 training sessions. Supervision will consist of phone calls or visits to the clinics to understand if  
41 and how training was being utilised by participants.  
42  
43  
44  
45  
46

### 47 **Timing of intervention delivery and follow-up**

48  
49 COMGAP-S will run for 7 months in each facility and catchment area. Every 2 weeks a facility will  
50 be enrolled in the study until all 23 have completed the study timeline. Participants discontinuing  
51 engagement will not be subject to follow-up. Measures will be collected at six time points:  
52  
53  
54  
55  
56  
57  
58  
59  
60

- 1  
2  
3 1. Pre-training monitoring period: questionnaire to establish a baseline on current practice.  
4  
5 Primary care practitioners only: recruitment of patients for diagnosis verification.  
6  
7 Patients administered Hopkins Symptom Checklist 25 for anxiety and/or depression (baseline),  
8  
9 and at 3- and 6-months follow-up to assess change in clinical symptoms.  
10  
11 2. Pre-training intervention: WHO mhGAP knowledge pre-test and AMIQ stigma questionnaire.  
12  
13 3. Post-training intervention: second administration of WHO mhGAP knowledge test.  
14  
15 4. Post-training monitoring period: questionnaire to establish if/how practice has changed, and  
16  
17 qualitative interviews to reflect on initial diagnosis practice.  
18  
19 5. 3 months follow-up training: WHO mhGAP pre- and post- knowledge test and AMIQ stigma  
20  
21 questionnaire.  
22  
23 6. 6 months follow-up training: WHO mhGAP pre- and post- knowledge test and AMIQ stigma  
24  
25 questionnaire.  
26  
27  
28  
29  
30  
31 .  
32  
33  
34  
35  
36

### 37 **Statistical methods**

38  
39  
40  
41 The primary unit of analysis (i.e., where the intervention is carried out) is the healthcare facility,  
42  
43 and data collected from the individual participants will include: sociodemographic information,  
44  
45 conflict and displacement experience, mhGAP knowledge test scores, AMIQ stigma scores, and  
46  
47 pre- and post- monitoring questionnaires. Descriptive statistics will be used to summarize  
48  
49 observations using means, standard deviations, and proportions where appropriate.  
50

51 An intention-to-treat analysis will be used to analyze the effect of the intervention. In the stepped  
52  
53 wedge design, similar information will be collected repeatedly on individuals within facilities; we  
54  
55 will therefore utilize statistical models that can adjust for repeat measures and clustering of  
56  
57

1  
2  
3 participants within facilities (in the case of PHPs and CRs). In particular, for the analysis of mhGAP  
4 knowledge test scores and AMIQ stigma scores as outcomes of interest among participants, we  
5 plan to use generalized linear mixed models that include random intercepts for individuals (to  
6 account for repeat measurements), random intercepts for facilities (to account for the correlation  
7 among individuals within the same facility), and adjustments for covariates. Statistical analysis  
8 will be carefully conducted as repeated time measures over a 7-month time period will mean  
9 missing data points and shifted timelines due to external circumstances. Subgroup analysis will  
10 be conducted to understand differences between clusters and well as within clusters.

11  
12 For qualitative data, interviews with primary care practitioners will continue until saturation has  
13 been met and thematic analysis will be used to analyse results.

14 Fidelity checks will be included in the study through the utilization of feedback forms after the end  
15 of each training session to investigate if any major concerns have arisen that could be addressed  
16 before subsequent sessions. Further, a process evaluation will be conducted to understand if the  
17 study adhered to protocol, and how the intervention was received by participants.

### 18 19 20 21 22 23 24 25 26 27 28 29 30 31 32 33 34 35 **Sample size calculation**

36 A total of 23 primary care practitioners, 75 public health professionals, 50 community  
37 representatives, and 200 patients will be recruited. Target sample sizes were calculated  
38 separately for each participant group and for each outcome. Sample sizes for the first and second  
39 outcomes were calculated following methods described by Hemming and Taljaard, where each  
40 outcome is considered an individually randomized trial and then multiplied by a design effect to  
41 account for the stepped wedge design [17]. Sample sizes for the third and fourth outcomes were  
42 calculated using formulae from the 1994 textbook “Analysis of Longitudinal Data” by Diggle, Liang  
43 and Zeger [18].

### 44 45 46 47 48 49 50 51 52 53 54 55 56 **Ethics and Dissemination**

1  
2  
3 Ethical approval has been received from the Faculty of Health, Education, Medicine and Social  
4 Care, Anglia Ruskin University, UK (SC/jc/FMFREP/16/17 076), from the Faculty of Medicine,  
5 University of Jaffna, Sri Lanka (J/ERC/17/81/NDR/0170) and non-engagement approval from the  
6 funding body, the Centers for Disease Control and Prevention (2018-015). Trial results and  
7 analyses will be purposefully communicated to the Provincial Department of Health Service,  
8 Regional Divisional Health Secretariats in all five districts of Northern Province, participating  
9 healthcare professionals and community representatives. Dissemination events will be held with  
10 the University of Jaffna. Activities will include publications and presentations to general and  
11 specialized audience by team members. The research dataset and statistical analyses will be  
12 available by request from the primary investigator.  
13  
14  
15  
16  
17  
18  
19  
20  
21  
22  
23  
24  
25  
26  
27  
28  
29

## 30 **Evaluation**

### 31 **Cost Ratio Economic Evaluation**

32  
33 This component will involve two evaluations. The first will evaluate the ratio between costs  
34 associated of training primary care practitioners to identify, treat and refer mental health care  
35 patients compared to costs of referral to, and treatment from, psychiatrists. Costs will be linked to  
36 the primary outcome measure to determine the extra cost of training incurred to detect one extra  
37 patient and understand economic implications of service provision to conflict-affected populations  
38 [19]. The second will evaluate the ratio between costs associated with patients receiving care  
39 from trained primary care practitioners at primary care facilities compared to costs of seeking care  
40 from specialist psychiatrists.  
41  
42  
43  
44  
45  
46  
47  
48  
49  
50  
51  
52  
53

### 54 **Process Evaluation**

1  
2  
3 After initial training, 3- and 6-month refresher courses, quantitative and qualitative feedback will  
4 be collected from participants to explore how training was received. Qualitative case studies with  
5 primary health care staff, trainers, supervisors, patients will take place during post-training  
6 monitoring and evaluation periods to understand how the programme was received and  
7 implemented. Descriptive analysis will be used for quantitative data, while thematic analysis will  
8 be used for qualitative data.  
9  
10  
11  
12  
13  
14  
15  
16  
17  
18  
19

## 20 **DISCUSSION**

21  
22 Due to the history of conflict and displacement in Sri Lanka, it is vital to address unmet mental  
23 health needs of the population. The completed cross-sectional survey at primary care level  
24 (Phase 1) supports this and demonstrates prevalence and predictors of mental health disorders  
25 in the region. The WHO mhGAP IG 2.0 training programme provides a strategy to address this  
26 gap between those seeking, and those able, to access mental health services in the region (Phase  
27 2). COMGAP-S will not only demonstrate the feasibility of implementing the mhGAP training  
28 programme, but ongoing monitoring activities will contribute to evaluation of both training and  
29 implementation.  
30  
31  
32  
33  
34  
35  
36  
37  
38  
39  
40

41 Using the mhGAP guide to train participants on how to identify and treat common mental health  
42 disorders could empower primary care practitioners to effectively address mental health needs of  
43 the population in this post-conflict setting. This will also take pressure of limited specialized  
44 psychiatry services in the region. Additionally, training public health professionals and community  
45 representatives can positively increase mental health awareness and decrease stigma in the local  
46 community. Training materials have undergone cultural adaptation to ensure training is relevant  
47 and acceptable to all participants and stakeholders. Use of a locally adapted mhGAP guide will  
48 increase acceptability and sustainability of the implementation of the clinical trial. This project  
49  
50  
51  
52  
53  
54  
55  
56  
57  
58  
59  
60



1  
2  
3 includes key stakeholders from Northern Ministry of Health, University of Jaffna, Sri Lankan  
4 psychiatrists, and Sri Lankan researchers. Thus, COMGAP-S will not only contribute to the  
5 evidence base on integrating mental health services in primary care in low resource settings, it  
6 will also build local capacity, be culturally relevant, and sustainable.  
7  
8  
9

10  
11  
12  
13 COMGAP-S will be the first large-scale implementation of WHO mhGAP IG 2.0 training to improve  
14 mental health service delivery in primary care in Northern Province, Sri Lanka. Implementation of  
15 COMGAP-S aims to build capacity within the primary care system in the region, but also improve  
16 mental health service delivery addressing the unmet needs of a vulnerable population.  
17  
18  
19  
20  
21  
22  
23  
24  
25  
26

27 **Figure 1.** Primary Care Practitioner study timeline

28 **Figure 2.** Public Health Professional study timeline

29 **Figure 3.** Community representative study timeline  
30  
31  
32  
33  
34  
35  
36  
37  
38  
39  
40  
41  
42  
43  
44  
45  
46  
47  
48  
49  
50  
51  
52  
53  
54  
55  
56  
57  
58  
59  
60

1  
2  
3 **Authors' contributions:** SD developed the concept and design of this study with contributions  
4 from GD, AE, BR, RS and MA. SD wrote the manuscript with contributions from GD, AE, BR,  
5 RS and MA. All authors commented on and approved the final version of this manuscript.  
6  
7

### 8 9 **Data sharing statement**

10 Individual participant data that underlie the results after deidentification (texts, tables, figures,  
11 and appendices), along with the study protocol can be shared immediately following publication,  
12 with no end date, to researchers who provide a methodologically sound proposal and/or to  
13 achieve aims in the approved proposal. Proposals should be directed to  
14 shannon.doherty@anglia.ac.uk. To gain access, data requestors will need to sign a data access  
15 agreement.  
16  
17  
18  
19  
20  
21

### 22 **Patient and Public Involvement**

23 Research materials and project aims were developed in collaboration with academic and  
24 service provider stakeholders to ensure priorities were addressed. Participants were consulted  
25 during the pilot stage to ensure research questions and materials were appropriate and  
26 relevant. Once the trial has been published, participants and the public will be informed of the  
27 results through a dedicated website (<http://globalhme.org>) as well as through paper leaflets,  
28 townhall discussions and social media to ensure both specialist and non-specialist audience can  
29 access study findings.  
30  
31  
32  
33  
34  
35

36 **Funding statement:** This journal article was supported by the Centers for Disease Control and  
37 Prevention, Cooperative Agreement Number, 1U01GH001654-01. Its contents are solely the  
38 responsibility of the authors and do not necessarily represent the official views of the Centers for  
39 Disease Control and Prevention or the Department of Health and Human Services. The Funding  
40 organization was involved in consultations regarding the scientific validity of the design, analysis  
41 of the data, preparation and review of the manuscript for publication. The Northern Ministry of  
42 Health, Sri Lanka was involved in management of the data collection. The University of Jaffna,  
43 Sri Lanka was involved in consultations on the design of the study, collection and interpretation  
44 of data, preparation and review of the manuscript for publication. RS is part-funded by: i) the  
45 National Institute for Health Research (NIHR) Biomedical Research Centre at the South London  
46 and Maudsley NHS Foundation Trust and King's College London; ii) a Medical Research  
47 Council (MRC) Mental Health Data Pathfinder Award to King's College London; iii) an NIHR  
48 Senior Investigator Award.  
49  
50  
51  
52  
53  
54  
55  
56  
57  
58  
59  
60

1  
2  
3  
4  
5 **Competing interests statement:** RS declares research support received in the last 5 years  
6 from Roche, Janssen, GSK and Takeda.  
7  
8  
9  
10

11  
12  
13  
14 **Acknowledgements:** The authors would like to sincerely thank Dr Chesmal Siriwardhana who  
15 unexpectedly passed away in 2016. Dr Siriwardhana was the original Principal Investigator and  
16 was responsible for the initial conception of this study. This publication was supported by the  
17 Cooperative Agreement Number GH001654, funded by the Centers for Disease Control and  
18 Prevention. Its contents are solely the responsibility of the authors and do not necessarily  
19 represent the official views of the Centers for Disease Control and Prevention or the Department  
20 of Health and Human Services. This project was also supported by the Northern Ministry of  
21 Health, Sri Lanka, and the University of Jaffna, Sri Lanka.  
22  
23  
24  
25  
26  
27  
28  
29  
30  
31  
32  
33  
34  
35  
36  
37  
38  
39  
40  
41  
42  
43  
44  
45  
46  
47  
48  
49  
50  
51  
52  
53  
54  
55  
56  
57  
58  
59  
60

## References

1. Siriwardhana C, Adikari A, Pannala G, et al. Prolonged Internal Displacement and Common Mental Disorders in Sri Lanka: The COMRAID Study. *PLOS ONE* 8(5): e64742. <https://doi.org/10.1371/journal.pone.0064742> [published Online First: 22 May 2013].
2. Patel V, Belkin GS, Chockalingam A, Cooper J, et al. Grand Challenges: Integrating Mental Health Services into Priority Health Care Platforms. *PLOS Medicine* 10(5): e1001448. <https://doi.org/10.1371/journal.pmed.1001448> [published Online First: 28 May 2013].
3. Makhashvili N, Chikovani I, McKee M, et al. Mental Disorders and Their Association With Disability Among Internally Displaced Persons and Returnees in Georgia. *Journal of Traumatic Stress*. 2014;27(5):509-518. <https://doi.org/10.1002/jts.21949> [published Online First: 16 October 2014].
4. Somasundaram D. Recent disasters in Sri Lanka: lessons learned. *Psychiatric Clinics* 2013;36(3), 321-338. [published Online First: 1 September 2013].
5. Husain F, Anderson M, Cardozo BL, et al. Prevalence of war-related mental health conditions and association with displacement status in postwar Jaffna District, Sri Lanka. *JAMA*, 2011;306(5), 522-531. <https://doi.org/10.1001/jama.2011.1052> [published Online First: 3 August 2011].
6. Siriwardhana, C. Windows of opportunity after a disaster: the case of Sri Lanka. *Asian Bioethics Review*, 2010;2(2).
7. Jenkins R, Baingana F, Ahmad R, McDaid D, Atun R. Social, economic, human rights and political challenges to global mental health. *Ment Health Fam Med*. 2011 Jun;8(2):87-96.
8. Siriwardhana C, Adikari A, Pannala G, et al. Changes in mental health prevalence among long-term displaced and returnee forced migrants in Sri Lanka (COMRAID-R). *BMC Psych*, 2015;15, 41.
9. Patel V, Chowdhary N, Rahman A, Verdelli H. Improving access to psychological treatments: Lessons from developing countries. *Behaviour Research and Therapy*. 2011;49(9):523–8. <https://doi.org/10.1016/j.brat.2011.06.012>
10. Chibanda D, Mesu P, Kajawu L, Cowan F, Araya R, Abas MA. Problem-solving therapy for depression and common mental disorders in Zimbabwe: piloting a task-shifting primary mental health care intervention in a population with a high prevalence of people living with HIV. *BMC Pub Health*. 2011;11(1). <https://doi.org/10.1186/1471-2458-11-828> [published Online First: 26 October 2011]

- 1  
2  
3 11. Lund C, Tomlinson M, De Silva M, Fekadu A, Shidhaye R, et al. PRIME: A Programme to  
4 Reduce the Treatment Gap for Mental Disorders in Five Low- and Middle-Income Countries.  
5 PLOS Medicine 2012;9(12): e1001359. <https://doi.org/10.1371/journal.pmed.1001359>  
6 [published Online First: 27 December 2012]  
7
- 8 12. Doherty S, Hulland E, Lopes-Cardozo B, Kirupakaran S, Surenthirakumaran R, Cookson S,  
9 et al. Prevalence of mental disorders and epidemiological associations in post-conflict primary  
10 care attendees: a cross-sectional study in the Northern Province of Sri Lanka. *BMC Psychiatry*.  
11 2019;19(1). <https://doi.org/10.1186/s12888-019-2064-0> [published Online First 4 March 2019].  
12  
13
- 14 13. World Health Organization. mhGAP training manuals for the mhGAP intervention guide for  
15 mental, neurological and substance use disorders in non-specialized health settings. World  
16 Health Organization, 2017. [https://www.who.int/publications-detail/mhgap-intervention-guide---  
17 version-2.0](https://www.who.int/publications-detail/mhgap-intervention-guide---version-2.0).  
18  
19
- 20 14. Brown CA, Lilford RJ. The stepped wedge trial design: a systematic review. *BMC Med Res*  
21 *Method*. 2006;6(1). <https://doi.org/10.1186/1471-2288-6-54> [published Online First 8 November  
22 2006].  
23  
24
- 25 15. Siriwardhana C, Adikari A, Jayaweera K, Abeyrathna B, Sumathipala A. Integrating mental  
26 health into primary care for post-conflict populations: a pilot study. *Intl Jour Ment Health Sys*  
27 2016;10(1). <https://doi.org/10.1186/s13033-016-0046-x> [published Online First 27 February  
28 2016].  
29
- 30 16. Doherty S, Dass G, Edward A, Manolova G, Solomon M. Challenges and lessons learned in  
31 re-filming the WHO mhGAP training videos for Sri Lankan context - a qualitative study. *Conflict*  
32 *and Health*. 2020;14(1) <https://doi.org/10.1186/s13031-020-00259-z> [published Online First 13  
33 February 2020].  
34  
35
- 36 17. Hemming K, Taljaard M. Sample size calculations for stepped wedge and cluster  
37 randomised trials: a unified approach. *J Clin Epi* 2016;69:137–46.  
38 <https://doi.org/10.1016/j.jclinepi.2015.08.015> [published Online First 5 September 2015].  
39
- 40 18. Diggle P, Diggle PJ, Heagerty P, Liang KY, Heagerty PJ, & Zeger S. Analysis of  
41 Longitudinal Data. Oxford University Press 2002.  
42
- 43 19. Chisholm D, James S, Sekar K, Kumar KK, Murthy RS, Saeed K, et al. Integration of mental  
44 health care into primary care. *Brit J Psych* 2000;176(6):581–8.  
45 <https://doi.org/10.1192/bjp.176.6.581> [published Online First 2 January 2018].  
46  
47  
48  
49  
50  
51  
52  
53  
54  
55  
56  
57  
58  
59  
60

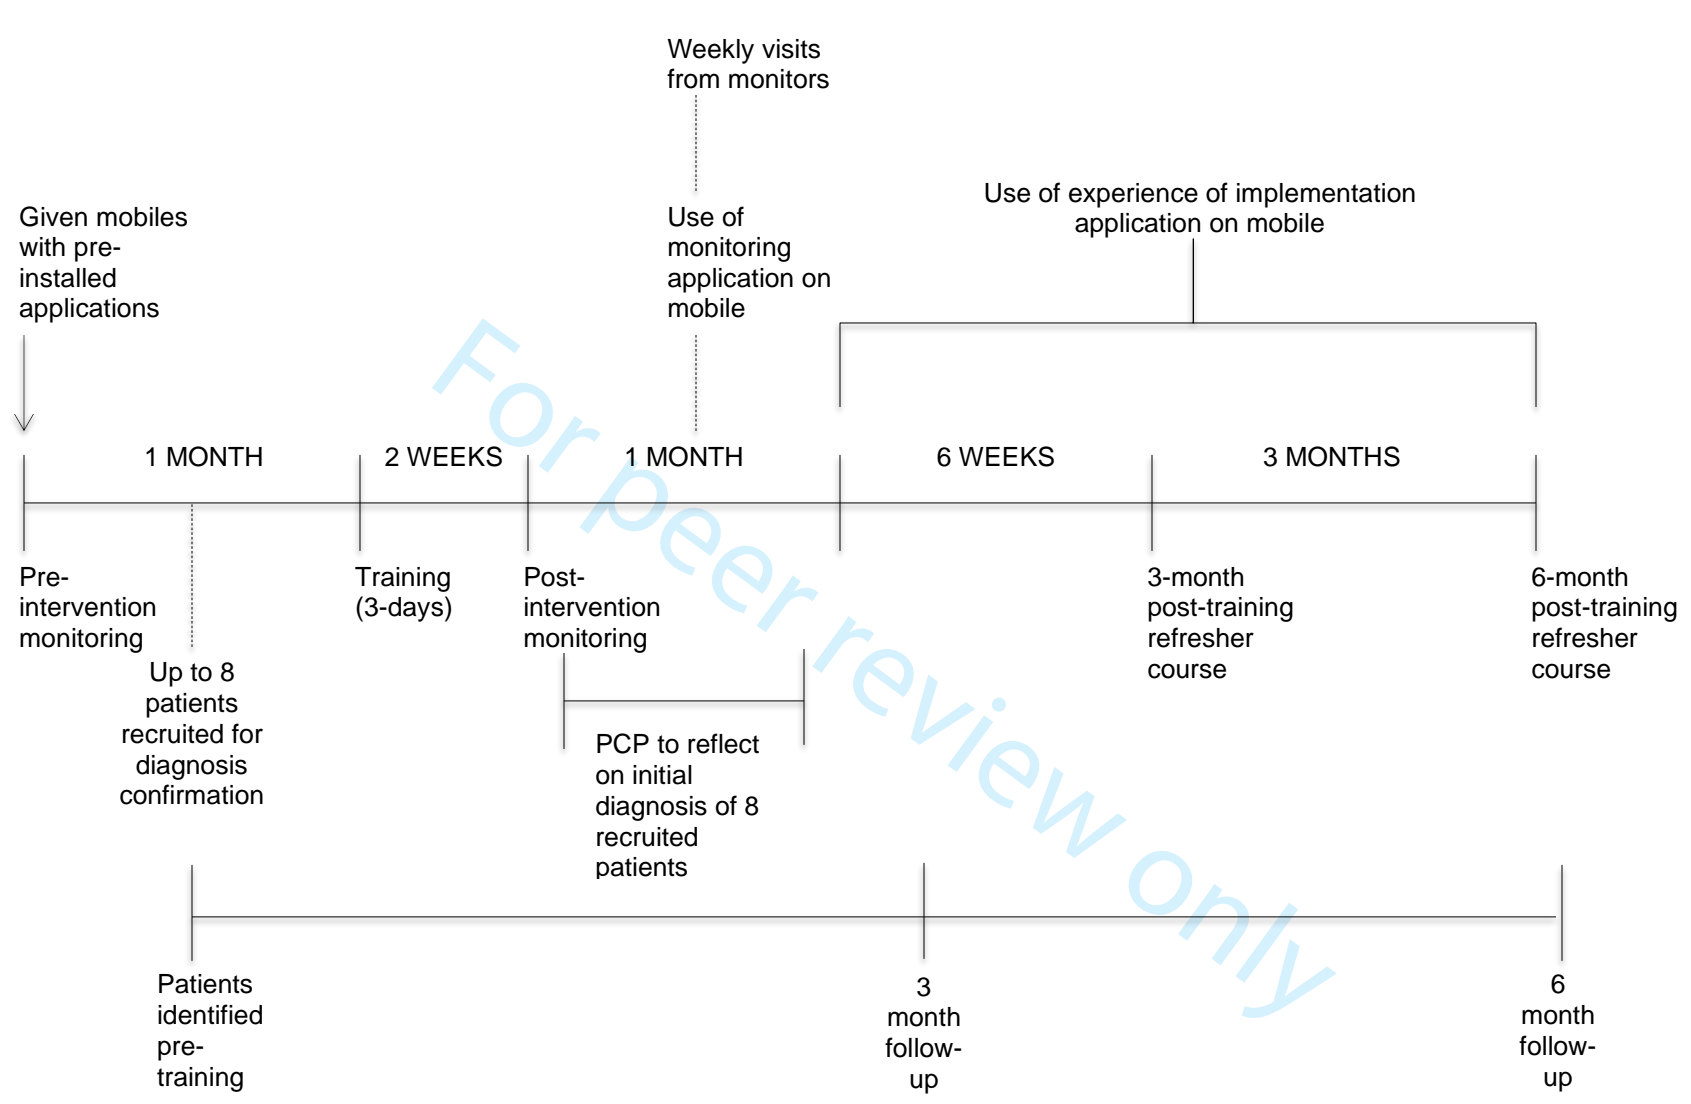

**Figure 1.** Primary Care Practitioner study timeline

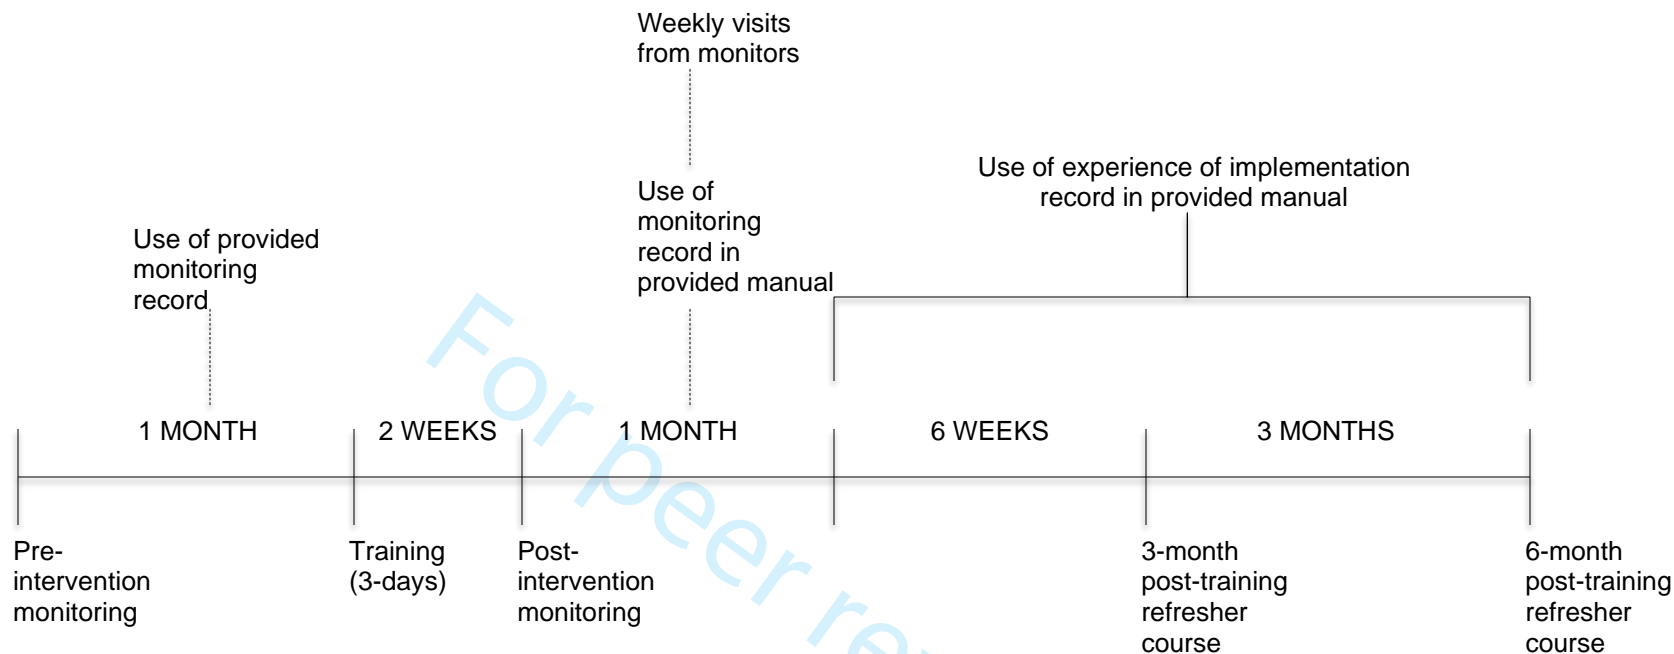

**Figure 2.** Public Health Professional study timeline

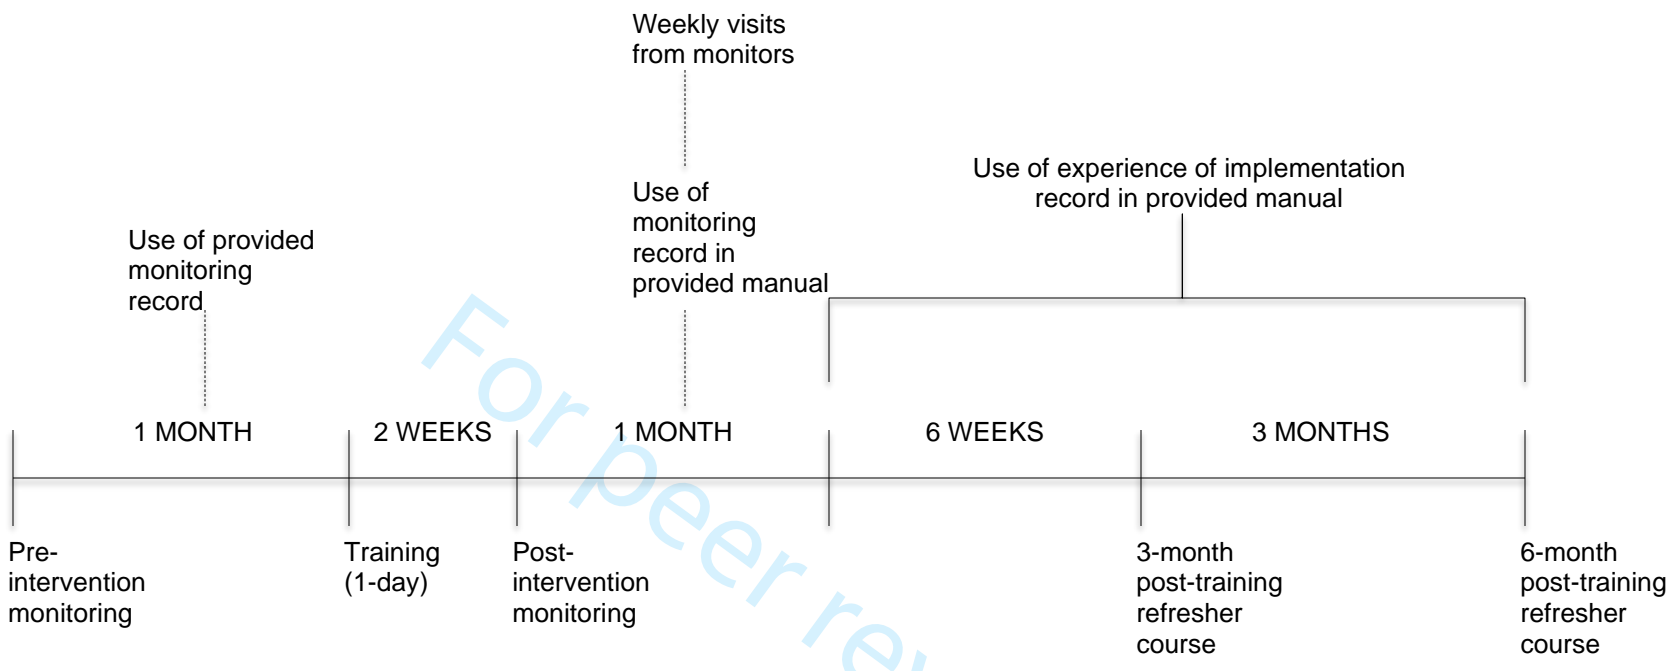

**Figure 3.** Community representative study timeline



# BMJ Open

## Protocol of a randomized clinical trial to integrate mental health services into primary care for post-conflict populations in Northern Sri Lanka (COMGAP-S)

|                                 |                                                                                                                                                                                                                                                                                                                                                                                                                                                                |
|---------------------------------|----------------------------------------------------------------------------------------------------------------------------------------------------------------------------------------------------------------------------------------------------------------------------------------------------------------------------------------------------------------------------------------------------------------------------------------------------------------|
| Journal:                        | <i>BMJ Open</i>                                                                                                                                                                                                                                                                                                                                                                                                                                                |
| Manuscript ID                   | bmjopen-2021-051441.R2                                                                                                                                                                                                                                                                                                                                                                                                                                         |
| Article Type:                   | Protocol                                                                                                                                                                                                                                                                                                                                                                                                                                                       |
| Date Submitted by the Author:   | 16-Nov-2021                                                                                                                                                                                                                                                                                                                                                                                                                                                    |
| Complete List of Authors:       | Doherty, Shannon; Anglia Ruskin University<br>Dass, Giselle; THEME Institute, 50, 13 Old Kesbewa Road, Nugegoda<br>Edward, Anne; THEME Institute, 50, 13 Old Kesbewa Road, Nugegoda<br>Stewart, Robert; King's College London, Institute of Psychiatry<br>Roberts, Bayard; London School of Hygiene and Tropical Medicine,<br>Abas, Melanie; Institute of Psychiatry, King's College London, Section of<br>Epidemiology, Health Services & Population Research |
| <b>Primary Subject Heading</b>: | Global health                                                                                                                                                                                                                                                                                                                                                                                                                                                  |
| Secondary Subject Heading:      | Health services research, Mental health                                                                                                                                                                                                                                                                                                                                                                                                                        |
| Keywords:                       | MENTAL HEALTH, PRIMARY CARE, PSYCHIATRY                                                                                                                                                                                                                                                                                                                                                                                                                        |
|                                 |                                                                                                                                                                                                                                                                                                                                                                                                                                                                |

SCHOLARONE™  
Manuscripts

1  
2  
3 **Title:** Protocol of a randomized clinical trial to integrate mental health services into primary care  
4  
5 for post-conflict populations in Northern Sri Lanka (COMGAP-S)  
6  
7  
8  
9  
10

11 **Authors:** Shannon Doherty, PhD, Anglia Ruskin University, Cambridge, United Kingdom;  
12  
13 Giselle Dass, THEME Institute, Colombo, Sri Lanka; Anne Edward, THEME Institute, Colombo,  
14  
15 Sri Lanka; Robert Stewart, MD, King's College London, United Kingdom; Bayard Roberts, PhD,  
16  
17 London School of Hygiene and Tropical Medicine, United Kingdom; Melanie Abas, PhD, King's  
18  
19 College London, United Kingdom  
20  
21  
22  
23  
24  
25

26 **Corresponding Author:** Shannon Doherty, PhD, Anglia Ruskin University, Bishop Hall Lane,  
27  
28 Chelmsford, UK, CM1 1SQ, shannon.doherty@anglia.ac.uk, +44 75 2212 8409  
29  
30  
31  
32  
33  
34  
35  
36  
37  
38  
39  
40  
41  
42  
43  
44  
45  
46  
47  
48  
49  
50  
51  
52  
53  
54  
55  
56  
57  
58  
59  
60

## ABSTRACT

### Introduction

Sri Lanka has a long history of armed conflict and natural disasters increasing risk of mental health disorders in the population. Due to a lack of specialist services, there is a treatment gap between those seeking and those able, to access mental health services. The aim of this research programme is to integrate mental health services into primary care to meet the needs of this post-conflict population.

### Methods and analysis

This is a stepped wedge cluster design randomized clinical trial of the World Health Organisation mhGAP primary care mental health training intervention. We will provide a 10-day training to primary care practitioners of 23 randomly selected primary care facilities aimed at increasing their ability to identify, treat, and manage common mental health disorders. Public health professionals and community representatives will receive a tailored training intervention to increase mental health awareness. Refresher courses will occur at 3- and 6-months post-training. Supervision and monitoring will occur for one month pre- and post-training. Target sample sizes have been calculated separately for each group of participants and for each outcome.

### Ethics and dissemination

This trial has received ethical approval from the Faculty of Health, Education, Medicine and Social Care, Anglia Ruskin University, UK (SC/jc/FMFREP/16/17 076), from the Faculty of Medicine, University of Jaffna, Sri Lanka (J/ERC/17/81/NDR/0170) and non-engagement approval from the funding body, the Centers for Disease Control and Prevention (2018-015). All participants gave written consent.

Dissemination of study results will be completed through publication of academic articles, conference presentations, townhall meetings, written pamphlets in plain language, reports to Ministry of Health and other government organisations, and through social media outlets.

## Trial Registration

ISRCTN registry ISRCTN62598070, 1 Sept 2017. SLCTR registration number: SLCTR/2018/008, 27 Feb 2018.

## Abbreviations

WHO mhGAP - World Health Organization's mental health Gap Action Programme

LMIC - Low- and middle-income countries

## Keywords

Conflict, clinical trial, health systems, mental health, mhGAP

## Strengths and limitations of this study

- First study to culturally adapt all World Health Organisation mhGAP written and video training materials
- Seeks to demonstrate feasibility of using World Health Organisation mhGAP materials to train non-specialists
- Multiple refresher sessions should increase knowledge retention among participants
- Representative sample means findings could be generalized to other areas of Northern Sri Lanka
- Limited to publicly available healthcare facilities as private facilities were excluded

**Word count: 3,999**

## INTRODUCTION

1  
2  
3 Mental health disorders often present in primary care settings, especially in low- and middle-  
4 income countries (LMIC), where specialized psychiatric services may be lacking. Low- or non-  
5 detection, low referral rates for specialist care, and increased costs are all features of mental  
6 health disorders in primary care settings in LMIC. Furthermore, lack of adequate training for  
7 primary care physicians and lack of involvement of public health personnel can act as barriers to  
8 effective treatment and management of common mental health disorders in primary care [1, 2].  
9  
10 Barriers can be compounded in post-conflict situations, as existing limited health systems may be  
11 severely affected, especially for those internally displaced. There is strong evidence that conflict-  
12 driven, internally displaced migrants have increased rates of mental health disorders [1, 3].  
13  
14  
15  
16  
17  
18  
19  
20  
21  
22  
23

24 During 26 years of protracted internal conflict in Sri Lanka, more than 100,000 people of all  
25 ethnicities are estimated to have died, and hundreds of thousands injured [4, 5]. Substantial  
26 internal displacement from conflict was compounded by the 2004 tsunami [6].  
27  
28  
29  
30  
31

32 Although Sri Lanka has an effective primary care system, the treatment gap for mental health is  
33 extensive, especially for post-conflict populations [1, 7]. While provision of health services has  
34 improved, resources are insufficient to meet population needs, especially those related to severity  
35 of trauma, or to difficulties experienced in displacement or return migration [8]. Primary care  
36 practitioners in the Northern Province region regularly spearhead mental health care efforts,  
37 however, they do so without adequate training. Training primary care practitioners to deliver  
38 mental health care at primary care level is in line with the task-shifting approach in the global  
39 mental health field [2, 9-11]. A pilot feasibility study (COMGAP) to explore this possibility was  
40 conducted in 2013-2014 based on a peer-reviewed protocol and is reported elsewhere [8].  
41  
42  
43  
44  
45  
46  
47  
48  
49  
50  
51

52  
53  
54 The first phase of the study was completed in 2015-2016 and facilitated understanding of mental  
55 disorder burden and treatment gap at primary care level. Results from the cross-sectional study  
56  
57  
58  
59  
60

1  
2  
3 indicated the most prevalent mental health disorders in primary care settings were depression  
4 (41.1%, 95% CI: 38.7-44.5%), anxiety (46.7%, 95% CI: 41.9-51.5%), post-traumatic stress  
5 disorder (13.7%, 95% CI: 10.6-16.8%), and psychosis with hypomania (17.6%, 95 CI: 13.3-21.9)  
6 [12]. While this facilitated understanding of the underlying mental health issues within the region,  
7 the issue of unmet need was still present. In this context, the aim of Phase 2 of COMGAP-S is to  
8 use a scaled-up training intervention based on the World Health Organization Mental Health Gap  
9 Action Programme (WHO mhGAP 2.0) to integrate mental health services into primary care by  
10 providing training to primary care practitioners and public health professionals serving conflict-  
11 affected populations in primary care settings in Northern Province [12, 13]. The second phase of  
12 the project was conducted between 2016-2021. COMGAP-S is the first large-scale trial in the  
13 region to use mhGAP to integrate mental health services into primary care for conflict-affected  
14 populations. Further, it is the only trial to include wider health care staff and community members  
15 as part of a long-term strategy to improve mental health awareness and stigma reduction.  
16  
17  
18  
19  
20  
21  
22  
23  
24  
25  
26  
27  
28  
29  
30  
31  
32

### 33 **Aims and objectives**

34 The aim of COMGAP-S is to investigate if implementation of WHO mhGAP training within primary  
35 care settings increases identification and treatment of common mental disorders for post-conflict  
36 populations in Northern Province, Sri Lanka.  
37  
38  
39  
40

#### 41 Primary outcomes

- 42  
43 1. 30% increase in patients identified and treated for common mental health disorders, and  
44 referrals to specialist care for complex mental disorders by primary care practitioners. Measured  
45 at baseline using the pre/post-monitoring questionnaires on current practice with mental health  
46 patients and compared to post-training practice.  
47  
48
- 49  
50 2. 40% minimum concurrence between diagnoses of patients identified with mental disorders of  
51 interest by trained primary care practitioners and psychiatrists as compared to diagnosis of  
52 patients pre-training (baseline) measured using quantitative reporting forms from the consultant  
53  
54  
55  
56  
57

1  
2  
3 psychiatrist and in-depth, individual interviews with trained primary care practitioners to  
4 understand any changes in practice.

5  
6  
7 3. 20% reduction in positive screening for depression and anxiety in patients pre-training and at  
8 3- and 6-months follow-up time points, measured using the Hopkins Symptom-Checklist 25.

### 11 Secondary outcomes

12  
13 1. 20% increase between mean pre- and post-training test scores for primary care practitioners  
14 using the WHO mhGAP 2.0 pre/post training test.

15  
16  
17 2. At least 50% reduction of mental health stigma measured using Attitudes to Mental Illness  
18 Questionnaire (AMIQ) in primary care practitioner, public health professional, and community  
19 representative participant groups at training, and 3- and 6-month follow-up. Prevalence rates were  
20 based on previous mental health studies conducted within the country [1,5].

21  
22  
23 3. At least 40% of primary care practitioners and public health professionals in the region will be  
24 delivered training on mhGAP, and at least 2 community representatives from each facility  
25 catchment areas will receive tailored training on mental health awareness and stigma reduction.

## 34 METHODS AND ANALYSIS

### 41 Study design

42  
43 This is a randomized clinical trial using a stepped wedge cluster design [14]. This design  
44 comprises a preliminary period where no clusters (healthcare facilities) are exposed to the  
45 intervention, then at regular intervals, one cluster is randomized to cross from control to  
46 intervention. This continues until all clusters have been exposed [14]. The stepped wedge design  
47 is increasingly utilized to evaluate interventions that involve service delivery and involves  
48 sequential and random crossover of clusters (facilities) from control (delivery of standard care) to  
49 intervention (mhGAP training) until all clusters are exposed [14]. The stepped wedge design takes

1  
2  
3 into account logistical constraints to sequentially roll out the intervention by training one facility at  
4 a time enabling us to understand how this intervention can be implemented in the future on a  
5 larger scale. This design was chosen because: 1) in an intervention trying to integrate mental  
6 health services into primary care for post-conflict populations it is unethical to use a parallel design  
7 which prevents equal distribution of knowledge and skills; 2) the stepped wedge cluster design is  
8 more logistically feasible in the post-conflict setting of Northern Sri Lanka [15].  
9  
10  
11  
12  
13  
14  
15  
16  
17

18 Facilities will be randomized using standardized randomization techniques to allocate facilities to  
19 the training sequence within the stepped wedge design. Patients and community representatives  
20 will not be randomized. The study team cannot be blinded to the allocation of facilities. The study  
21 psychiatrist will be masked to randomization status of facilities from which patients originate.  
22 Patients will also be blinded to facility randomization status. [1]  
23  
24  
25  
26  
27  
28  
29  
30

31 There is a theoretical possibility of contamination due to close professional or personal networks  
32 between participant groups and geographical location of facilities. However, this is not envisaged  
33 to exert significant influence on expected outcomes due to specifics of the extensive training,  
34 requirement to carry out intensive tasks, and low risk of contamination through informal  
35 discussions [1]. Potential contamination will be observed at all stages and taken into account at  
36 the end of the study. Further, an important strength of cluster sampling is that it helps mitigate the  
37 risk of treatment contamination between intervention and control groups.  
38  
39  
40  
41  
42  
43  
44  
45  
46

## 47 **Setting**

48 The study setting will be 23 government primary care health facilities within the five districts of the  
49 Northern Province: Jaffna, Mannar, Kilinochchi, Vavuniya, and Mullaitivu. A full list of participating  
50 sites can be obtained from the Primary Investigator..  
51  
52  
53  
54  
55  
56  
57  
58  
59  
60



1  
2  
3 A list of public primary care facilities was provided to the study team by Northern Ministry of  
4 Health. A random number generator will be used to select 23 facilities across 5 districts.  
5  
6 Distribution of clusters will be allocated proportionally to total numbers of internally displaced  
7  
8 people in each district (districts with larger numbers were assigned more clusters). This will ensure  
9  
10 adequate representation of conflict displacement and severity.  
11  
12  
13  
14  
15

### 16 **Inclusion criteria**

17  
18 Facilities will be included if they indicate willingness to participate, are located in any of the five  
19  
20 districts of Northern Province (Jaffna, Mannar, Kilinochchi, Vavuniya, Mullaitivu), provide primary  
21  
22 care services, and are either divisional hospitals of type A, B & C or primary medical care units.  
23  
24 Facilities should also provide services to conflict-affected, previously displaced populations.  
25  
26  
27

28 Primary care practitioners will be included if they have full registration with the Sri Lankan Medical  
29  
30 Council, have at least 6 months or more until their next transfer rotation, or 6 months to retirement.  
31  
32 Public health professionals will be included if they have at least 6 months left on their transfer  
33  
34 rotation, or 6 months to retirement. Community representatives located within catchment areas  
35  
36 of each selected facility will be included after identification through local registration organisations.  
37  
38 Patients will be included if they are 18 years or older, attend selected facilities, and belong to  
39  
40 internally displaced or conflict-affected populations.  
41  
42  
43  
44

### 45 **Exclusion criteria**

46  
47 Larger facilities such as district hospitals and teaching hospitals will be excluded as they are not  
48  
49 part of the primary care system. Private facilities will be excluded due to lack of an official registry.  
50  
51  
52  
53  
54  
55  
56  
57  
58  
59  
60

1  
2  
3 Primary care practitioners, public health professionals, and community representatives will be  
4 excluded if they have secondary mental health training. Patients under 18 years and those  
5 diagnosed with mental disorders outside of depression and/or anxiety will be excluded.  
6  
7  
8  
9

### 10 11 **Recruitment and enrolment**

12 Support letters from Provincial Department of Health Service, and Regional Divisional Health  
13 Secretariats in each district of Northern Province will be used to approach primary care  
14 practitioners and public health professionals. Community representatives will be recruited through  
15 local registration organizations. Patients will be recruited by primary care practitioners. Trained  
16 research team members will perform screening and enrolment procedures and gain informed  
17 consent for each participant group following established study protocols.  
18  
19  
20  
21  
22  
23  
24  
25  
26  
27  
28  
29

### 30 31 **Structure and delivery of the intervention**

32 Training material was adapted for local use and included translation and cultural adaption of  
33 relevant modules of the WHO mhGAP 2.0 IG, and production of locally developed mhGAP video  
34 material for the Tamil context [16]. This was completed in collaboration with local academics,  
35 psychiatrists, primary care practitioners, Northern Province Ministry of Health, and the University  
36 of Jaffna.  
37  
38  
39  
40  
41  
42

43 Training will consist of delivery of written materials, role plays, and training videos. All training  
44 material was developed in collaboration with Sri Lankan researchers, local psychiatrists and  
45 community physicians. All material was translated, back translated, and piloted for cultural  
46 appropriateness prior to the full project.  
47  
48  
49  
50

51 Almost all instruments used in the study had been previously applied in epidemiological studies  
52 within Sri Lanka and are available in Tamil, Sinhala, and English languages. New instruments  
53 were translated, back translated and adapted for cultural appropriateness in collaboration with  
54  
55  
56  
57  
58  
59  
60

1  
2  
3 the Sri Lankan research team. Further, the entire set of measures was field tested in a pilot study  
4 prior to the full study commencing. This pilot study examined if measures were understood by  
5 participants, culturally acceptable, and translations correct.  
6  
7

8  
9 To ensure safety of participants, a local psychiatrist will be involved throughout the study to  
10 provide free mental health care if required.  
11  
12  
13

### 14 15 16 Primary care practitioners and patients

17  
18 Primary care practitioners (general physicians practicing in selected facilities) will undergo one  
19 month of monitoring prior to training to establish a baseline. Primary care practitioners will be  
20 trained using the mhGAP manual to recognize common mental health disorders using screening  
21 procedures, delivery brief psychosocial interventions (psychoeducation, Motivational  
22 Interviewing), and referral procedures for complex cases. They will receive a paper booklet to  
23 record information on patients identified, treated, managed, and/or referred for mental health  
24 disorders. Further, before training, primary care practitioners will be asked to recruit up to eight  
25 patients using provided inclusion and exclusion criteria to have anxiety and/or depression  
26 diagnoses verified by a psychiatrist. Members of the research team will provide patients with  
27 information sheets and consent forms available in all 3 official languages (English, Tamil, Sinhala)  
28 and obtain informed consent. Patients will complete a brief socio-demographic questionnaire at  
29 point of recruitment and the Hopkins Symptom Checklist-25 screening questionnaire for  
30 depression and anxiety at point of recruitment, and at 3- and 6-months follow-up to establish a  
31 baseline, and determine if patient outcomes change after training of primary care practitioners.  
32 Primary care practitioners will be asked detailed questions about their management and treatment  
33 of recruited patients, and patients will be asked about any treatments undertaken or medications  
34 prescribed to understand any intervening factors between baseline, and 3- and 6-months follow-  
35 up.  
36  
37  
38  
39  
40  
41  
42  
43  
44  
45  
46  
47  
48  
49  
50  
51  
52  
53  
54  
55  
56  
57  
58  
59  
60

1  
2  
3 After the one-month monitoring period, primary care practitioners will undergo a 3-day training  
4 intervention delivered in their primary care facility. Trained members of the research team will  
5 deliver training at each selected facility to minimize disruption of work at facilities. PCP trainers  
6 have Masters degrees in psychology and global mental health, and have successfully completed  
7 the WHO mhGAP train-the-trainers program.  
8  
9  
10  
11  
12

13  
14  
15 After completion of training, monitoring of primary care practitioners will continue for one month,  
16 where they will continue to use the paper booklet to record information on patients they identify,  
17 treat, manage, for common mental health disorders and any cases they refer to specialized care  
18 Research team members will visit or telephone the primary care practitioners once a week at their  
19 facility to monitor implementation of the training intervention.  
20  
21  
22  
23  
24  
25  
26  
27

28 After the one-month monitoring period primary care practitioners will continue to use paper  
29 booklets to record their experience of the training implementation for six weeks. At this point (three  
30 months post-training) primary care practitioners will participate in a 1-day refresher course and  
31 continue to use the experience of training implementation application for a further three months.  
32 At six months post-training, primary care practitioners will take a second 1-day refresher course  
33 (Figure 1).  
34  
35  
36  
37  
38  
39  
40

41 Non-clinical supervision at all time points will be provided by research assistants who previously  
42 delivered training sessions. Supervision will consist of phone calls or visits to the clinics to  
43 understand if and how training is being utilised by participants. Supervision is meant to understand  
44 if and how trained participants utilise mhGAP, accurate delivery of interviewing or diagnostic skills  
45 were not evaluated.  
46  
47  
48  
49  
50  
51  
52

53  
54 Public health professionals  
55  
56  
57  
58  
59  
60

1  
2  
3 Public health professionals (nurse attendants, midwives) in each selected facility will undergo one  
4 month of monitoring prior to training to establish a baseline. Public health professionals will be  
5 trained using adapted written materials from the mhGAP training to recognize signs of common  
6 mental health issues, provide basic psychosocial care (education) and refer onwards if needed.  
7  
8 PHP trainers hold Bachelors' degrees in psychology and have undergone 7 days training with  
9 senior members of the research team. Each enrolled public health professional will record  
10 information in a paper booklet on facilitation of referral and follow-up practices for mental health  
11 patients, and support primary care practitioners with patient management activities. After the one-  
12 month monitoring period, public health professionals will be provided with a tailored 3-day training  
13 programme on mental health awareness, management, referral, and stigma reduction. After  
14 training, public health professionals will undergo one month of monitoring and record the same  
15 information as in the pre-monitoring period to see how/if practice has changed. Research team  
16 members will visit or telephone their facility once a week to monitor implementation of the training  
17 intervention.

18  
19  
20  
21  
22  
23  
24  
25  
26  
27  
28  
29  
30  
31  
32  
33  
34  
35 After the one-month, monitoring period public health professionals will record information on their  
36 experience of the training intervention for six weeks. At this point (three months post-training),  
37 public health professionals will participate in a 1-day refresher course and continue to use the  
38 paper booklets to record their experience of training implementation for a further three months. At  
39 six months post-training, public health professionals will take a second 1-day refresher course  
40 (Figure 2).

41  
42  
43  
44  
45  
46  
47 Non-clinical supervision at all time points will be provided by research assistants who delivered  
48 previous training sessions. Supervision will consist of phone calls or visits to the clinics to  
49 understand if and how training was being utilised by participants.  
50  
51  
52  
53  
54

55  
56 Community representatives  
57

1  
2  
3 Community representatives (teachers, social workers) will undergo one month of monitoring prior  
4 to training to establish a baseline. Community representatives will be trained using adapted  
5 materials from the mhGAP training material to recognize signs of common mental illness, delivery  
6 basic psychosocial education and learn referral pathways and where to seek providers. CR  
7 trainers hold Bachelors' degrees in psychology and have undergone 7 days training with senior  
8 members of the research team. Each enrolled community representative will record information  
9 in a paper booklet on mental health awareness raising activities undertaken, and any referrals of  
10 people they encounter with mental health issues. After the one-month monitoring period,  
11 community representatives will participate in a tailored 1-day training programme on mental health  
12 awareness, stigma reduction, and finding local resources. After training, community  
13 representatives will undergo one month of monitoring and record the same information as in the  
14 pre-monitoring period to see how/if practice has changed. Research team members will visit or  
15 telephone once a week to monitor implementation of the training intervention.  
16  
17  
18  
19  
20  
21  
22  
23  
24  
25  
26  
27  
28  
29  
30  
31

32 After the one-month, monitoring period community representatives' will record information on their  
33 experience of the training intervention in paper booklets for six weeks. At this point (three months  
34 post-training), community representatives will participate in a half-day refresher course and  
35 continue to use provided booklets to record their experience of training implementation for a  
36 further three months. At six months post-training, community representatives will participate in a  
37 second half-day refresher course (Figure 3).  
38  
39  
40  
41  
42  
43  
44

45 Non-clinical supervision at all time points will be provided by research assistants who delivered  
46 previous training sessions. Supervision will consist of phone calls or visits to the clinics to  
47 understand if and how training was being utilised by participants.  
48  
49  
50  
51  
52  
53

#### 54 **Timing of intervention delivery and follow-up**

55  
56  
57  
58  
59  
60

1  
2  
3 COMGAP-S will run for 7 months in each facility and catchment area. Every 2 weeks a facility will  
4 be enrolled in the study until all 23 have completed the study timeline. Participants discontinuing  
5 engagement will not be subject to follow-up. Measures will be collected at six time points:  
6  
7

8  
9 1. Pre-training monitoring period: questionnaire to establish baseline on current practice. Primary  
10 care practitioners only: recruitment of patients for diagnosis verification.  
11

12 Patients administered Hopkins Symptom Checklist 25 for anxiety and/or depression (baseline),  
13 and at 3- and 6-months follow-up to assess change in clinical symptoms.  
14

15  
16 2. Pre-training intervention: WHO mhGAP knowledge pre-test and AMIQ stigma questionnaire.  
17

18  
19 3. Post-training intervention: second administration of WHO mhGAP knowledge test.  
20

21  
22 4. Post-training monitoring period: questionnaire to establish if/how practice has changed, and  
23 qualitative interviews to reflect on initial diagnosis practice.  
24

25  
26 5. 3 months follow-up training: WHO mhGAP pre- and post- knowledge test and AMIQ stigma  
27 questionnaire.  
28

29  
30 6. 6 months follow-up training: WHO mhGAP pre- and post- knowledge test and AMIQ stigma  
31 questionnaire.  
32  
33  
34  
35  
36  
37  
38  
39  
40  
41  
42

### 43 **Statistical methods**

44  
45  
46

47 The primary unit of analysis (i.e., where the intervention is carried out) is the healthcare facility,  
48 and data collected from individual participants will include: sociodemographic information, conflict  
49 and displacement experience, mhGAP knowledge test scores, AMIQ stigma scores, and pre- and  
50 post- monitoring questionnaires. Descriptive statistics will be used to summarize observations  
51  
52  
53  
54  
55  
56  
57  
58  
59  
60

1  
2  
3 using means, standard deviations, and proportions where appropriate. Data analysis will be  
4 conducted using SAS version 9.4M7 [17].  
5

6  
7 An intention-to-treat analysis will be used to analyze the effect of the intervention. In the stepped  
8 wedge design, similar information will be collected repeatedly on individuals within facilities; we  
9 will therefore utilize statistical models that can adjust for repeat measures and clustering of  
10 participants within facilities (in the case of PHPs and CRs). In particular, for the analysis of mhGAP  
11 knowledge test scores and AMIQ stigma scores as outcomes of interest among participants, we  
12 plan to use generalized linear mixed models that include random intercepts for individuals (to  
13 account for repeat measurements), random intercepts for facilities (to account for the correlation  
14 among individuals within the same facility), and adjustments for covariates. Statistical analysis  
15 will be carefully conducted as repeated time measures over a 7-month time period will mean  
16 missing data points and shifted timelines due to external circumstances. Subgroup analysis will  
17 be conducted to understand differences between clusters and well as within clusters. Planned  
18 subgroup analysis will investigate possible differences between clusters (for example, differences  
19 between PHPs across facilities)  
20  
21  
22  
23  
24  
25  
26  
27  
28  
29  
30  
31  
32  
33

34 For qualitative data, interviews with primary care practitioners will continue until saturation has  
35 been met and thematic analysis will be used..  
36  
37

38 Fidelity checks will be included through utilization of feedback forms after the end of each training  
39 session to investigate if any major concerns have arisen that could be addressed before  
40 subsequent sessions. Further, a process evaluation will be conducted to understand if the study  
41 adhered to protocol, and how the intervention was received by participants.  
42  
43  
44  
45  
46  
47  
48

### 49 **Sample size calculation**

50  
51 A total of 23 primary care practitioners, 75 public health professionals, 50 community  
52 representatives, and 200 patients will be recruited. Target sample sizes were calculated  
53 separately for each participant group and for each outcome. Sample sizes for the first and second  
54  
55  
56  
57



1  
2  
3 outcomes were calculated following methods described by Hemming and Taljaard, where each  
4 outcome is considered an individually randomized trial and then multiplied by a design effect to  
5 account for the stepped wedge design [18]. Sample sizes for the third and fourth outcomes were  
6 calculated using formulae from the 1994 textbook “Analysis of Longitudinal Data” by Diggle, Liang  
7 and Zeger [19].  
8  
9  
10  
11  
12

### 13 14 15 16 **Ethics and Dissemination**

17  
18 Ethical approval has been received from the Faculty of Health, Education, Medicine and Social  
19 Care, Anglia Ruskin University, UK (SC/jc/FMFREP/16/17 076), the Faculty of Medicine,  
20 University of Jaffna, Sri Lanka (J/ERC/17/81/NDR/0170) and non-engagement approval from the  
21 funding body, the Centers for Disease Control and Prevention (2018-015). Trial results and  
22 analyses will be purposefully communicated to the Provincial Department of Health Service,  
23 Regional Divisional Health Secretariats in all five districts of Northern Province, participating  
24 healthcare professionals and community representatives. Dissemination events will be held with  
25 the University of Jaffna. Activities will include publications and presentations to general and  
26 specialized audience by team members. The research dataset and statistical analyses will be  
27 available by request from the primary investigator.  
28  
29  
30  
31  
32  
33  
34  
35  
36  
37  
38  
39  
40  
41  
42  
43  
44

### 45 **Evaluation**

#### 46 **Cost Ratio Economic Evaluation**

47  
48 This component will involve two evaluations. The first will evaluate the ratio between costs  
49 associated of training primary care practitioners to identify, treat and refer mental health care  
50 patients compared to costs of referral to, and treatment from, psychiatrists. Costs will be linked to  
51 the primary outcome measure to determine the extra cost of training incurred to detect one extra  
52  
53  
54  
55  
56  
57  
58  
59  
60

1  
2  
3 patient and understand economic implications of service provision to conflict-affected populations  
4 [20]. The second will evaluate the ratio between costs associated with patients receiving care  
5 from trained primary care practitioners at primary care facilities compared to costs of seeking care  
6 from specialist psychiatrists.  
7  
8  
9  
10

### 11 12 13 14 Process Evaluation

15 After initial training, 3- and 6-month refresher courses, quantitative and qualitative feedback will  
16 be collected from participants to explore how training was received. Qualitative case studies with  
17 primary health care staff, trainers, supervisors, patients will take place during post-training  
18 monitoring and evaluation periods to understand how the programme was received and  
19 implemented. Descriptive analysis will be used for quantitative data, while thematic analysis will  
20 be used for qualitative data.  
21  
22  
23  
24  
25  
26  
27  
28  
29  
30  
31  
32

## 33 DISCUSSION

34 Due to the history of conflict and displacement in Sri Lanka, it is vital to address unmet mental  
35 health needs.. The completed cross-sectional survey at primary care level (Phase 1) supports this  
36 and demonstrates prevalence and predictors of mental health disorders in the region. The WHO  
37 mhGAP IG 2.0 training programme provides a strategy to address this gap between those  
38 seeking, and those able, to access mental health services in the region (Phase 2). COMGAP-S  
39 will not only demonstrate the feasibility of implementing the mhGAP training programme, but  
40 ongoing monitoring activities will contribute to evaluation of both training and implementation.  
41  
42  
43  
44  
45  
46  
47  
48  
49  
50

51 Using the mhGAP guide to train participants to identify and treat common mental health disorders  
52 could empower primary care practitioners to effectively address mental health needs of the  
53 population in this post-conflict setting. This will also take pressure off limited specialized  
54  
55  
56  
57  
58  
59  
60

1  
2  
3 psychiatry services in the region. Additionally, training public health professionals and community  
4 representatives can positively increase mental health awareness and decrease stigma in the local  
5 community. Use of a locally adapted mhGAP guide will increase acceptability and sustainability  
6 of the implementation of the clinical trial. This project includes key stakeholders from Northern  
7 Ministry of Health, University of Jaffna, Sri Lankan psychiatrists, and Sri Lankan researchers.  
8  
9 Thus, COMGAP-S will not only contribute to the evidence base on integrating mental health  
10 services in primary care in low resource settings, it will also build local capacity, be culturally  
11 relevant, and sustainable.  
12  
13  
14  
15  
16  
17  
18  
19  
20  
21

22 COMGAP-S will be the first large-scale implementation of WHO mhGAP IG 2.0 training to improve  
23 mental health service delivery in primary care in Northern Province, Sri Lanka. Implementation of  
24 COMGAP-S aims to build capacity within the primary care system in the region, but also improve  
25 mental health service delivery addressing the unmet needs of a vulnerable population.  
26  
27  
28  
29  
30  
31  
32  
33  
34  
35

36 **Figure 1.** Primary Care Practitioner study timeline

37 **Figure 2.** Public Health Professional study timeline

38 **Figure 3.** Community representative study timeline  
39  
40  
41  
42  
43  
44  
45  
46  
47  
48  
49  
50  
51  
52  
53  
54  
55  
56  
57  
58  
59  
60

1  
2  
3  
4  
5  
6  
7  
8  
9  
10 **Authors' contributions:** SD developed the concept and design of this study with contributions  
11 from GD, AE, BR, RS and MA. SD wrote the manuscript with contributions from GD, AE, BR,  
12 RS and MA. All authors commented on and approved the final version of this manuscript.  
13  
14

### 15 **Data sharing statement**

16 Individual participant data that underlie the results after deidentification (texts, tables, figures,  
17 and appendices), along with the study protocol can be shared immediately following publication,  
18 with no end date, to researchers who provide a methodologically sound proposal and/or to  
19 achieve aims in the approved proposal. Proposals should be directed to  
20 shannon.doherty@anglia.ac.uk. To gain access, data requestors will need to sign a data access  
21 agreement.  
22  
23  
24  
25  
26  
27

### 28 **Patient and Public Involvement**

29 Research materials and project aims were developed in collaboration with academic and  
30 service provider stakeholders to ensure priorities were addressed. Participants were consulted  
31 during the pilot stage to ensure research questions and materials were appropriate and  
32 relevant. Once the trial has been published, participants and the public will be informed of the  
33 results through a dedicated website (<http://globalhme.org>) as well as through paper leaflets,  
34 townhall discussions and social media to ensure both specialist and non-specialist audience can  
35 access study findings.  
36  
37  
38  
39  
40  
41

42 **Funding statement:** This journal article was supported by the Centers for Disease Control and  
43 Prevention, Cooperative Agreement Number, 1U01GH001654-01. Its contents are solely the  
44 responsibility of the authors and do not necessarily represent the official views of the Centers for  
45 Disease Control and Prevention or the Department of Health and Human Services. The Funding  
46 organization was involved in consultations regarding the scientific validity of the design, analysis  
47 of the data, preparation and review of the manuscript for publication. The Northern Ministry of  
48 Health, Sri Lanka was involved in management of the data collection. The University of Jaffna,  
49 Sri Lanka was involved in consultations on the design of the study, collection and interpretation  
50 of data, preparation and review of the manuscript for publication. RS is part-funded by: i) the  
51  
52  
53  
54  
55  
56  
57  
58  
59  
60

1  
2  
3 National Institute for Health Research (NIHR) Biomedical Research Centre at the South London  
4 and Maudsley NHS Foundation Trust and King's College London; ii) a Medical Research  
5 Council (MRC) Mental Health Data Pathfinder Award to King's College London; iii) an NIHR  
6 Senior Investigator Award.  
7  
8  
9

10  
11 **Competing interests statement:** RS declares research support received in the last 5 years  
12 from Roche, Janssen, GSK and Takeda.  
13  
14

15  
16  
17  
18  
19  
20  
21 **Acknowledgements:** The authors would like to sincerely thank Dr Chesmal Siriwardhana who  
22 unexpectedly passed away in 2016. Dr Siriwardhana was the original Principal Investigator and  
23 was responsible for the initial conception of this study. This publication was supported by the  
24 Cooperative Agreement Number GH001654, funded by the Centers for Disease Control and  
25 Prevention. Its contents are solely the responsibility of the authors and do not necessarily  
26 represent the official views of the Centers for Disease Control and Prevention or the Department  
27 of Health and Human Services. This project was also supported by the Northern Ministry of  
28 Health, Sri Lanka, and the University of Jaffna, Sri Lanka.  
29  
30  
31  
32  
33  
34  
35  
36  
37  
38  
39  
40  
41  
42  
43  
44  
45  
46  
47  
48  
49  
50  
51  
52  
53  
54  
55  
56  
57  
58  
59  
60

## References

1. Siriwardhana C, Adikari A, Pannala G, et al. Prolonged Internal Displacement and Common Mental Disorders in Sri Lanka: The COMRAID Study. *PLOS ONE* 8(5): e64742. <https://doi.org/10.1371/journal.pone.0064742> [published Online First: 22 May 2013].
2. Patel V, Belkin GS, Chockalingam A, Cooper J, et al. Grand Challenges: Integrating Mental Health Services into Priority Health Care Platforms. *PLOS Medicine* 10(5): e1001448. <https://doi.org/10.1371/journal.pmed.1001448> [published Online First: 28 May 2013].
3. Makhshvili N, Chikovani I, McKee M, et al. Mental Disorders and Their Association With Disability Among Internally Displaced Persons and Returnees in Georgia. *Journal of Traumatic Stress*. 2014;27(5):509-518. <https://doi.org/10.1002/jts.21949> [published Online First: 16 October 2014].
4. Somasundaram D. Recent disasters in Sri Lanka: lessons learned. *Psychiatric Clinics* 2013;36(3), 321-338. [published Online First: 1 September 2013].
5. Husain F, Anderson M, Cardozo BL, et al. Prevalence of war-related mental health conditions and association with displacement status in postwar Jaffna District, Sri Lanka. *JAMA*, 2011;306(5), 522-531. <https://doi.org/10.1001/jama.2011.1052> [published Online First: 3 August 2011].
6. Siriwardhana, C. Windows of opportunity after a disaster: the case of Sri Lanka. *Asian Bioethics Review*, 2010;2(2).
7. Jenkins R, Baingana F, Ahmad R, McDaid D, Atun R. Social, economic, human rights and political challenges to global mental health. *Ment Health Fam Med*. 2011 Jun;8(2):87-96.
8. Siriwardhana C, Adikari A, Pannala G, et al. Changes in mental health prevalence among long-term displaced and returnee forced migrants in Sri Lanka (COMRAID-R). *BMC Psych*, 2015;15, 41.
9. Patel V, Chowdhary N, Rahman A, Verdelli H. Improving access to psychological treatments: Lessons from developing countries. *Behaviour Research and Therapy*. 2011;49(9):523–8. <https://doi.org/10.1016/j.brat.2011.06.012>

- 1  
2  
3 10. Chibanda D, Mesu P, Kajawu L, Cowan F, Araya R, Abas MA. Problem-solving therapy for  
4 depression and common mental disorders in Zimbabwe: piloting a task-shifting primary mental  
5 health care intervention in a population with a high prevalence of people living with HIV. *BMC*  
6 *Pub Health*. 2011;11(1). <https://doi.org/10.1186/1471-2458-11-828> [published Online First: 26  
7 October 2011]  
8
- 9 11. Lund C, Tomlinson M, De Silva M, Fekadu A, Shidhaye R, et al. PRIME: A Programme to  
10 Reduce the Treatment Gap for Mental Disorders in Five Low- and Middle-Income Countries.  
11 *PLOS Medicine* 2012;9(12): e1001359. <https://doi.org/10.1371/journal.pmed.1001359>  
12 [published Online First: 27 December 2012]  
13
- 14 12. Doherty S, Hulland E, Lopes-Cardozo B, Kirupakaran S, Surenthirakumaran R, Cookson S,  
15 et al. Prevalence of mental disorders and epidemiological associations in post-conflict primary  
16 care attendees: a cross-sectional study in the Northern Province of Sri Lanka. *BMC Psychiatry*.  
17 2019;19(1). <https://doi.org/10.1186/s12888-019-2064-0> [published Online First 4 March 2019].  
18  
19  
20
- 21 13. World Health Organization. mhGAP training manuals for the mhGAP intervention guide for  
22 mental, neurological and substance use disorders in non-specialized health settings. World  
23 Health Organization, 2017. [https://www.who.int/publications-detail/mhgap-intervention-guide---  
24 version-2.0](https://www.who.int/publications-detail/mhgap-intervention-guide---version-2.0).  
25  
26
- 27 14. Brown CA, Lilford RJ. The stepped wedge trial design: a systematic review. *BMC Med Res*  
28 *Method*. 2006;6(1). <https://doi.org/10.1186/1471-2288-6-54> [published Online First 8 November  
29 2006].  
30
- 31 15. Siriwardhana C, Adikari A, Jayaweera K, Abeyrathna B, Sumathipala A. Integrating mental  
32 health into primary care for post-conflict populations: a pilot study. *Intl Jour Ment Health Sys*  
33 2016;10(1). <https://doi.org/10.1186/s13033-016-0046-x> [published Online First 27 February  
34 2016].  
35  
36
- 37 16. Doherty S, Dass G, Edward A, Manolova G, Solomon M. Challenges and lessons learned in  
38 re-filming the WHO mhGAP training videos for Sri Lankan context - a qualitative study. *Conflict*  
39 *and Health*. 2020;14(1) <https://doi.org/10.1186/s13031-020-00259-z> [published Online First 13  
40 February 2020].  
41
- 42 17. SAS Institute, Cary, NC.  
43
- 44 18. Hemming K, Taljaard M. Sample size calculations for stepped wedge and cluster  
45 randomised trials: a unified approach. *J Clin Epi* 2016;69:137–46.  
46 <https://doi.org/10.1016/j.jclinepi.2015.08.015> [published Online First 5 September 2015].  
47
- 48 19. Diggle P, Diggle PJ, Heagerty P, Liang KY, Heagerty PJ, & Zeger S. Analysis of  
49 Longitudinal Data. Oxford University Press 2002.  
50
- 51 20. Chisholm D, James S, Sekar K, Kumar KK, Murthy RS, Saeed K, et al. Integration of mental  
52 health care into primary care. *Brit J Psych* 2000;176(6):581–8.  
53 <https://doi.org/10.1192/bjp.176.6.581> [published Online First 2 January 2018].  
54  
55  
56  
57  
58  
59  
60



Figure 1. Primary Care Practitioner study timeline





**Figure 2.** Public Health Professional study timeline



**Figure 3.** Community representative study timeline
